1                    **Compositional Data Analysis is necessary for simulating and analyzing RNA-Seq data**

2                    Warren A. McGee<sup>1</sup>, Harold Pimentel<sup>2,3</sup>, Lior Pachter<sup>4</sup> and Jane Y. Wu<sup>1,\*</sup>

3                    <sup>1</sup> Northwestern University, Department of Neurology (Chicago, IL, United States); <sup>2</sup> Stanford University,  
4                    Department of Genetics (Stanford, CA, United States); <sup>3</sup> Howard Hughes Medical Institute (Stanford, CA,  
5                    United States); <sup>4</sup> California Institute of Technology, Division of Biology and Biological Engineering (Pasadena,  
6                    CA, United States)

7                    Corresponding author: Jane Y. Wu ([jane-wu@northwestern.edu](mailto:jane-wu@northwestern.edu))

8                    **Keywords**

9                    Compositional Data Analysis, sleuth-ALR, absSimSeq, \*Seq, Differential Analysis, Normalization, spike-ins

11 **Abstract**

12 \*Seq techniques (e.g. RNA-Seq) generate *compositional* datasets, i.e. the number of fragments sequenced is  
13 not proportional to the sample's total RNA content. Thus, datasets carry only relative information, even though  
14 absolute RNA copy numbers are of interest. Current normalization methods assume most features do not  
15 change, which can lead to misleading conclusions when there are many changes. Furthermore, there are few  
16 real datasets and no simulation protocols currently available that can directly benchmark methods when many  
17 changes occur.

18

19 We present **absSimSeq**, an R package that simulates compositional data in the form of RNA-Seq reads. We  
20 compared **absSimSeq** with several existing tools used for RNA-Seq differential analysis: sleuth, DESeq2,  
21 edgeR, limma, sleuth and ALDEx2 (which explicitly takes a compositional approach). We compared the  
22 standard normalization of these tools to either “compositional normalization”, which uses log-ratios to anchor  
23 the data on a set of negative control features, or RUVSeq, another tool that directly uses negative control  
24 features.

25

26 Our analysis shows that common normalizations result in reduced performance with current methods when  
27 there is a large change in the total RNA per cell. Performance improves when spike-ins are included and used  
28 with a compositional approach, even if the spike-ins have substantial variation. In contrast, RUVSeq, which  
29 normalizes count data rather than compositional data, has poor performance. Further, we show that previous  
30 criticisms of spike-ins did not take into consideration the compositional nature of the data. We demonstrate  
31 that **absSimSeq** can generate more representative datasets for testing performance, and that spike-ins should  
32 be more frequently used in a compositional manner to minimize misleading conclusions in differential  
33 analyses.

34

## 35 **Author Summary**

36 A critical question in biomedical research is “Is there any change in the RNA transcript abundance when  
37 cellular conditions change?” RNA Sequencing (RNA-Seq) is a powerful tool that can help answer this  
38 question, but two critical parts of obtaining accurate measurements are (A) understanding the kind of data that  
39 RNA-Seq produces, and (B) “normalizing” the data between samples to allow for a fair comparison. Most tools  
40 assume that RNA-Seq data is count data, but in reality it is “compositional” data, meaning only  
41 percentages/proportions are available, which cannot directly answer the critical question. This leads to  
42 distorted results when attempting to simulate or analyze data that has a large global change.

43

44 To address this problem, we designed a new simulation protocol called **absSimSeq** that can more accurately  
45 represent RNA-Seq data when there are large changes. We also proposed a “compositional normalization”  
46 method that can utilize “negative control” features that are known to not change between conditions to anchor  
47 the data. When there are many features changing, this approach improves performance over commonly used  
48 normalization methods across multiple tools. This work highlights the importance of having negative controls  
49 features available and of treating RNA-Seq data as compositional.

## 50 Introduction

51 High-throughput methods, including RNA-Seq, are frequently used to determine what features—genes,  
52 transcripts, protein isoforms—change in abundance between different conditions [1]. Importantly, though,  
53 researchers ultimately care about the absolute abundance of RNA transcripts. In other words, is there a change  
54 in the number of RNA molecules in a cell when the conditions change? However, current techniques are limited  
55 to reporting relative abundances of RNA molecules: the proportion of fragments generated by a sequencer that  
56 contain a given sequence [2-5]. This means that RNA-Seq is inherently compositional data, where relative  
57 proportions are the only information available, yet those are being used to draw conclusions about the absolute  
58 abundance of features [2-5] (see Note 1 in **Supporting Information**). Several studies have raised the alarm on  
59 ways in which interpretation of the results can be distorted if RNA-Seq data are not properly treated as  
60 compositional [2-6].

61 The first statistical problem in an RNA-Seq analysis lies in determining the origin of the fragments generated.  
62 There are two classes of tools available to solve this problem: (1) tools that use traditional alignments to  
63 determine the exact genomic location (**tophat2**, **bwa**, **STAR**, **HISAT2**, etc.) (reviewed in [7]); there are other  
64 tools that take these traditional alignments and estimate exon-, transcript-, or gene-level expression levels  
65 (reviewed in [8]); (2) tools that probabilistically estimate transcript sets that are compatible with producing the  
66 corresponding fragments using pseudoalignment and quantify the levels of transcript expression (**kallisto**,  
67 **salmon**, **sailfish**) [9-11].

68 The second statistical problem, the focus of this paper, is to compare the differences in samples collected under  
69 different experimental conditions (e.g. comparing cancer cells with control cells; comparing wild-type cells with  
70 mutant cells). We will refer to this second step as “differential analysis.” A number of tools are available for  
71 differential analyses (**DESeq2**, **edgeR**, **limma-voom**, etc), using continuous or count data (reviewed in [1,12]).  
72 One recently developed tool, **slenth**, utilizes the bootstraps produced by the quasi-mapping tools to estimate  
73 the technical variation introduced by the inferential procedure [13].

74 It is a recognized need to normalize and transform the data before conducting differential analyses. Multiple  
75 strategies have been developed to meet this need, including quantile normalization [14], the trimmed mean of  
76 M-values (**TMM**) method used by **edgeR** [15], the median ratio method used by **DESeq** and **DESeq2** [16], and  
77 the **voom** transformation used by **limma** [17]. In addition, multiple units are used when modeling and reporting  
78 RNA-Seq results [18], including counts [16,19], CPM [17], FPKM [20], and TPM [21]. Importantly, all of these  
79 strategies, even those that are focused just on the counts for each feature, utilize units that are really proportions,  
80 which belies the fact that RNA-Seq data are compositional [5,22] (see Note 1 in **Supporting Information**).  
81 Furthermore, all of these normalization strategies assume that the total RNA content does not change  
82 substantially across the samples (see [23] for a review). This assumption allows users to leap from the inherently  
83 relative information contained in the dataset to the RNA copy number changes in the population under study  
84 without quantifying the actual RNA copy numbers. However, there are biological contexts where this assumption  
85 is not true [4,24,25], and it is unclear how much change can occur before distorting results when the datasets  
86 are not considered as compositional during analyses.

87 If information is available about negative controls (e.g. spike-ins, validated reference genes), then such  
88 information could be used to anchor the data. This has been done in several studies, where the use of spike-ins  
89 led to a radically different interpretation of the data compared to the standard pipeline [4,24,26]. In one study,  
90 the RUVg approach was designed to use this reference information to normalize RNA-Seq data, as part of the  
91 RUVSeq R package [27]. There have been recommendations to include spike-ins as part of the standard  
92 protocol [22,24,28]. However, Risso et al. observed significant variation in the percentage of reads mapping to  
93 spike-ins, as well as discordant global behavior between spike-ins and genes [27]. While spike-ins are often  
94 used in single-cell RNA-seq applications, they are not routinely used in bulk RNA-Seq experiments.

95 John Aitchison developed an approach to compositional data with the insight that ratios (or log-transformed  
96 ratios, called “log-ratios”) capture the relative information contained in compositional data [29]. There are three  
97 requirements for any analytical approach to compositional data: scale invariance, subcompositional coherence,  
98 and permutation invariance (see Note 2 in **Supporting Information**) [30]. It was recently demonstrated that  
99 correlation, a widely used measure of association in RNA-Seq analysis, is subcompositionally incoherent and

100 may lead to meaningless results, and an alternative called “proportionality” was proposed [4]. A tool was  
101 previously developed to apply compositional data analysis to differential analysis, called ALDEx2 [3]. However,  
102 ALDEx2 is not well-suited for utilizing the bootstraps generated by the pseudoalignment tools and is unable to  
103 detect any differentially expressed features when there are less than five replicates [31]. Therefore, it is  
104 necessary to develop a compositional approach for other tools.

105 Two tools are commonly used to simulate RNA-Seq: polyester and RSEM-sim [21,32]. These tools require the  
106 input of estimated counts per transcript and the expected fold changes between groups. However, without  
107 considering the data as compositional, protocols used to simulate RNA-Seq data result in the total read counts  
108 being confounded with the condition, such that one condition will have on average a greater depth compared to  
109 the other condition (for example, see Supplementary Table S2 of [13]). A protocol that simulates many changing  
110 features and at the same time yields similar sequencing depth per sample, is lacking, but could be done using  
111 principles from compositional data analysis. This challenge, along with the one above, both motivated the  
112 present work.

113 Here, we present **absSimSeq**, a protocol to simulate RNA-Seq data using concepts from compositional data  
114 analysis. This protocol allows us to directly model large global shifts in RNA content while still maintaining  
115 equivalent sequencing depths per sample. Further, we developed a normalization approach that uses negative  
116 control features (e.g. spike-ins) with log-ratios, which we call “compositional normalization”. We created an  
117 extension of sleuth, called **sleuth-ALR**, to use compositional normalization, both to predict candidate reference  
118 genes and to normalize the data. We also adapted already available methods to implement compositional  
119 normalization for other differential analysis tools. We then used absSimSeq to benchmark performance of  
120 differential analysis tools in the setting of either a small or large change to the total RNA content. Within each  
121 setting, we compared the current normalization approaches versus either compositional normalization or the  
122 RUVg approach with spike-ins.

123 When there was only a small change in total RNA content, all tested tools had similar performance on simulated  
124 data, whereas sleuth, sleuth-ALR and limma had the best performance on real data. However, when there was

125 a large change in the RNA content, either up or down, all tools had much better performance if compositional  
126 normalization with spike-ins was used. When analyzing a well-characterized real dataset which had a large  
127 change in total RNA content per cell [4,26], only compositional normalization with a validated reference gene  
128 was able to capture the overall decrease in RNA transcription. Surprisingly, RUVg had poor performance, and  
129 the choice of normalization approach had a greater impact on performance than the choice of tool. Furthermore,  
130 both of the concerns about spike-ins raised by Risso and colleagues [27] are actually the expected  
131 consequences of how compositional data behaves between samples, though they do raise concerns about the  
132 proper protocol for including spike-ins.

133 In summary, we provide **absSimSeq** as a resource to generate simulated RNA-Seq datasets that more  
134 accurately reflect the behavior of real datasets. This will help future development of RNA-Seq analysis when  
135 testing performance. Furthermore, our work suggests that using compositional normalization with spike-ins or  
136 validated reference genes is essential for differential analyses of RNA-seq data. When such information is  
137 missing, it raises major concerns about the limitations of drawing conclusions from the inherently compositional  
138 data of RNA-Seq and other “omics” techniques.

139

## 140 **Results**

### 141 *Simulation of RNA transcript copy numbers, normalization, and performance of different tools*

142 To test how changes in the total RNA content can affect performance of differential analysis tools, we developed  
143 **absSimSeq** to simulate RNA-Seq data (**Fig 1**). Because the experimental step of generating a library from  
144 samples in a real RNA-Seq experiment generates a compositional dataset, this protocol directly simulates that  
145 step, producing simulated compositional data. Using this protocol, we carried out three simulation studies, each  
146 having five experiments. In each study, current normalization methods were compared to compositional  
147 normalization and **RUVg**. A set of highly expressed spike-ins was used as the set of negative control features  
148 for compositional normalization and RUVg (see methods for details).

149 **Fig 1. AbsSimSeq, A novel simulation protocol to model compositional RNA-Seq data.** All RNA-Seq  
150 experiments convert copy numbers per cell to relative abundances because of the selection step and because  
151 the depth of sequencing is arbitrary with respect to the total RNA present (top panel; see Note 1 in **Supporting**  
152 **Information**). The **absSimSeq** protocol simulates that conversion process (bottom diagram), with the key, novel  
153 steps highlighted in red. It takes the mean empirical relative abundances (in TPM units) from any dataset. It then  
154 makes a conceptual leap by assuming those values are copy numbers per cell. Then, the fold changes are  
155 simulated on these copy numbers for the experimental condition. After that, in the crucial step of the protocol,  
156 the copy numbers are re-normalized back to relative abundances to simulate what happens in the RNA-Seq  
157 experiment. From there, the expected reads per transcripts are calculated using relative abundances and the  
158 median of the estimated effective lengths from the original dataset. These are then submitted to the polyester R  
159 package for a negative binomial simulation.

160 In the first study (“small”), only a small fraction of features were changed (5% of all transcripts), and the total  
161 RNA content was similar between experimental groups (<2% change) (**S1 Table** and **S2 Table**). This study was  
162 intended to simulate an experiment that fulfills the assumption of the current normalization methods. Under these  
163 conditions, all tools tested performed similarly whether using their current normalization approaches or using  
164 compositional normalization (**Fig 2A**; **S2 Fig**, panel A).

165 **Fig 2. Compositional normalization markedly improves performance when there is a large**  
166 **compositional change.** The copy numbers were modeled using the estimated average abundances from the  
167 GEUVADIS Finnish women samples (N = 58). Each of the three studies consists of five simulations under  
168 specified global conditions: (A) the “small” group has 5% of the transcriptome (~10K transcripts) simulated as  
169 differentially expressed, with the total average copy numbers per cell in each group roughly equal, (B) the  
170 “down” group has 20% of the transcriptome (~40K transcripts) simulated as differentially expressed, with 90%  
171 of the transcripts down-regulated, and (C) the “up” group has the same number of transcripts changing as the  
172 “down” group, but 90% of the transcripts are up-regulated. The compositional normalization methods (solid  
173 lines) used a set of highly expressed spike-ins to illustrate, especially in the “down” and “up” groups, what  
174 happens to the performance of tools when there is a large shift in the global copy numbers per cell. Average



175 false discovery rate across the simulations within each group ( $n = 5$ ) is shown on the x-axis, and average  
176 sensitivity is shown on the y-axis. The FDR range between 0 and 0.25 is shown. Note that edgeR+RUVg is not  
177 shown because it always had an FDR above 0.25. See **S2 Fig** for the full range.

178 In the second set of studies (“down” and “up”), many features were differentially expressed (20% of all  
179 transcripts), resulting in a large change in the composition, with the total RNA content decreased by ~33% or  
180 increased ~2.8-fold, respectively (**S1 Table** and **S2 Table**). Under such conditions, compositional normalization  
181 led to greatly improved performance for all tools compared to these tools using their current normalization  
182 methods (**Fig 2B-C**; **S2 Fig**, panels B-C). In contrast to current normalization methods and compositional  
183 normalization, the **RUVg** approach from **RUVSeq** resulted in the worst performance for edgeR and DESeq2 in  
184 all three studies (**Fig 2**), even though it used the same set of spike-ins as compositional normalization.

185 It is worth noting that, among the tools tested, sleuth and ALDEx2 performed the best when there were large  
186 compositional changes in the data (**Fig 2B-C**); ALDEx2 uses the IQLR transformation, which is a compositional  
187 approach designed to be robust in the presence of large changes to the composition. We also observed that for  
188 each transformation used by ALDEx2, it performed almost identically regardless of statistical test used (**S3 Fig**).  
189 Finally, sleuth-ALR had similar performance whether TPMs or estimated counts were modeled, or if the Wald  
190 test or the likelihood ratio test was used (**S4 Fig**).

191

#### 192 Performance is not degraded by significant variation in individual spike-ins

193 A previous study reported that spike-ins had significant variation [27], raising a concern about their utility for  
194 normalization. In particular, they observed significant variation both between and within groups. In our simulated  
195 data, spike-ins were modeled similarly as other features, with over-dispersed variation, drawing from a negative  
196 binomial distribution. When estimating the percentage of transcript fragments mapping to spike-ins per sample,  
197 we also detected significant variation across samples (**Fig 3**). Importantly, in the “up” and “down” studies, there  
198 were systematic differences between groups, similar to what was observed in the MAQC-III study and in the  
199 zebrafish study previously analyzed [27]. These systematic differences between groups are expected given the

200 compositional nature of the data (see Note 3 in **Supporting Information** and Discussion). We further observed  
201 a large spectrum of estimated fold changes across individual spike-ins, with a systematic asymmetry in the  
202 distribution of fold changes in the experiments from the “up” and “down” studies (**S5 Fig**). Despite the significant  
203 variation of spike-ins, individually and collectively, spike-ins led to greatly improved performance when used for  
204 normalization (**Fig 2**). Consistent with previous work [33,34], our results suggest that the ratio information  
205 contained in spike-ins are collectively robust to variation, and that spike-ins can be used for sample-wise  
206 normalization.

207 **Fig 3. Spike-ins have significant within-group and between-group variation, despite improved**  
208 **performance when used for normalization.** Previous work expressed a concern about variation observed in  
209 spike-ins between samples. In each experiment, the 92 ERCC spike-ins from Mix 1 were simulated to have no  
210 change in copy numbers between the two conditions, as well as to have over-dispersed variation between  
211 samples, drawing from a negative binomial distribution. Plotted here is the percentage of all fragments that  
212 map to spike-ins, compared to the total number of fragments from the sample, in **(A)** the “small” study, with  
213 <2% change in the total RNA in each condition; **(B)** the “down” study, with a ~33% decrease in total RNA in  
214 the experimental condition; and **(C)** the “up” study, with a ~2.8-fold increase in total RNA in the experimental  
215 condition. The dotted line represents the expected percentage of fragments mapping to spike-ins in the control  
216 group. Across all experiments, there is significant within-group variation; in the “down” and “up” studies, there  
217 is also significant between-group variation. The latter is to be expected given the compositional nature of the  
218 data (see Note 3 in **Supporting Information**).

219

220 **Sleuth-ALR has best self-consistency and negative control performance among compositional normalization**  
221 *methods*

222 To confirm that compositional normalization performs similarly to current methods in the context of real data, we  
223 repeated the analyses using data from the original study on sleuth [13]. The first test was the “self-consistency”  
224 test using data from [35]. We reasoned that a tool should provide consistent results from an experiment, whether

225 a few samples per group are sequenced (in this case,  $n = 3$  per group), or more samples per group are used ( $n$   
226 = 7-8), as measured by the “true positive rate” (TPR) and “false discovery rate” (FDR). In this experiment, true  
227 positives were defined as hits identified in both the smaller and larger datasets, and false positives were defined  
228 as hits identified by the smaller dataset but not by the larger dataset. Among all tools using compositional  
229 normalization, sleuth and sleuth-ALR with Wald test showed the best balance between the TPR and FDR (**Fig**  
230 **4; S6 Fig**). Limma-voom and sleuth/sleuth-ALR with the likelihood ratio test had the lowest FDR at the cost of a  
231 lower TPR. DESeq2 and edgeR both had higher FDR, and on average slightly lower TPR compared to sleuth-  
232 ALR. In contrast, the Welch and Wilcoxon statistics in ALDEx2 were unable to identify any hits in any of the  
233 “training” datasets, consistent with a recent benchmarking study [31] (data not shown), suggesting that they  
234 have greatly reduced power with less data ( $N = 3$  samples per group). ALDEx2’s “overlap” statistic was able to  
235 identify hits, but this led to the worst consistency (i.e. highest false discovery rate) among the tools tested. Finally,  
236 while DESeq2 with RUVg had similar performance to DESeq2 with compositional normalization, edgeR with  
237 RUVg had among the worst consistency.

238 **Fig 4. sleuth-ALR Wald has best balance of self-consistency between less and more data from same**  
239 **dataset.** Depicted is the Bottomly et al self-consistency test at the isoform level, with **(A)** the false discovery rate  
240 at three specified levels, and **(B)** the relative sensitivity as compared to sleuth-ALR with the Wald test. This  
241 extends the test from the original sleuth paper [13]. A large dataset is split into a small “training” dataset (3  
242 samples per group), and larger “validation” datasets. A “false discovery” in this test is defined as a hit identified  
243 in the “training” dataset but not in the larger “validation” dataset at the given FDR level, and a “true positive” in  
244 this test is a hit identified in both datasets at that FDR level. A tool performs well in this test if it can identify the  
245 same hits with less data, as well as control the “false discovery rate” at the specified FDR level. The full dataset  
246 was split twenty times. Note that the number above each tool in panel A is the number of “training” datasets out  
247 of twenty that identified at least one hit at the specified FDR level. See **S6 Fig** for the results at the FDR levels  
248 of 0.01 and 0.05.

249 Next, we tested the performance of compositional normalization on a negative control dataset, where there are  
250 no expected differentially expressed features. We repeated the null resampling experiment from the sleuth paper

251 [13] using the GEUVADIS Finnish women dataset (n = 58) [36]. Six samples were randomly selected (stratified  
252 by lab to minimize technical variation) and split into two groups, with the expectation of finding no hits. We found  
253 that sleuth-ALR with the likelihood ratio test performed similarly to sleuth and limma-voom (median number of  
254 false positives < 5) (**Fig 5**), and sleuth-ALR with the Wald test also showed good false positive control (median  
255 number of false positives = 10). In contrast, DESeq2 and edgeR with compositional normalization showed higher  
256 numbers of false positives (median of 71 and 66, respectively), and the “overlap” statistic for ALDEx2 showed  
257 the highest number of false positives (median of >5000 at the 0.1 FDR level).

258 **Fig 5. sleuth-ALR and limma perform best on the GEUVADIS null dataset.** Depicted is the null experiment  
259 at the isoform level (**A**). This also extends the test from the original sleuth paper [13]. The data were from the  
260 lymphoblastoid cells of 58 Finnish women, a relatively homogeneous population, taken from the GEUVADIS  
261 project [36]. Data from six women were resampled from the larger dataset, stratifying by lab to minimize technical  
262 variation, and then randomly split into two groups to simulate a “null experiment”. The number of false positives,  
263 defined as any hits, are reported here based on twenty rounds of resamplings. A tool performs well in this  
264 experiment by minimizing the number of hits reported. ALDEx2 used the IQLR transformation; all “C.N.” methods  
265 and sleuth-ALR used compositional normalization; all “RUVg” methods used RUVg for normalization.

266

267 *Performance of compositional normalization on a dataset with a global decrease in transcription*

268 To compare different tools in a real dataset with a large compositional change, we used the “yeast starvation  
269 dataset” [26]. In this dataset, yeast cells were starved of a nitrogen source, inducing them to enter a reversible  
270 quiescent state without active cell division [37]. Absolute copy numbers per cell were estimated for each mRNA  
271 by being normalized to a collection of 49 mRNAs that were quantified using NanoString nCounter [38]. Our re-  
272 analysis clearly shows a large global decrease in RNA content (**Fig 6A**), with ~95% of genes decreasing in copy  
273 numbers per cell in the starvation group versus control, confirming that the dataset has a large compositional  
274 change (**Fig 6B**). On the contrary, analyses using previously developed methods failed to identify this pattern of

275 changes in gene expression, only reporting equivalent numbers of hits up- and down-regulated transcripts  
276 (**Table 1**).

277 **Fig 6. A yeast starvation study shows a large global decrease in RNAs. (A)** A violin plot showing the  
278 distribution of absolute counts in control yeast cells (pink) and yeast cells starved of their nitrogen source for 24  
279 hours (green). The data were from Marguerat et al [26]. The absolute counts were estimated by normalizing  
280 RNA-Seq data to a panel of reference genes whose copy numbers were quantified using the NanoString  
281 nCounter assay. As can be observed, there is a global decrease in the RNA present. **(B)** a comparison of log<sub>2</sub>  
282 fold changes calculated using a standard RNA-Seq pipeline (the example shown here in gray is kallisto + sleuth),  
283 and the log<sub>2</sub> fold changes calculated using compositional normalization (sleuth-ALR, shown in purple) or directly  
284 from the estimated absolute counts (in blue). As shown, the vast majority of genes were observed to be  
285 downregulated when estimating from the absolute counts. The standard RNA-Seq approach misses this global  
286 shift, but compositional normalization is able to identify it.

287 Next, we examined the importance of using negative control features with compositional normalization. We first  
288 analyzed the data using the gene with the most constant proportion across all samples (as measured by  
289 coefficient of variation), *rqc1* (Pombase: SPAC1142.01). In this context, compositional normalization missed the  
290 global pattern of down-regulation; instead, it reported a similar numbers of hits compared to other tools using  
291 current normalization methods, both up-regulated and down-regulated (**Table 1**). We then selected a gene with  
292 approximately constant expression (*opt3*, Pombase: SPCC1840.12) as the denominator for compositional  
293 normalization. Compared to current methods, compositional normalization using a validated reference gene was  
294 able to identify the global decrease in transcription observed by previous analyses of the data [4,26] (**Table 1**).  
295 All tools tested (ALDEx2, DESeq2, edgeR, limma-voom, and sleuth-ALR) were able to identify a similar number  
296 of hits when using compositional normalization. In contrast, while RUVg was also given the same validated  
297 reference gene, surprisingly it had greatly reduced power and was unable to capture the global pattern of down-  
298 regulation.

299

| Tool                      | Up-Regulated Genes | Down-Regulated Genes |
|---------------------------|--------------------|----------------------|
| <b>ALDEx2 ALR overlap</b> | <b>719</b>         | <b>4496</b>          |
| ALDEx2 IQLR overlap       | 2716               | 2677                 |
| DESeq2                    | 2424               | 2415                 |
| <b>DESeq2 + C.N.</b>      | <b>632</b>         | <b>4344</b>          |
| <b>DESeq2 + RUVg</b>      | <b>698</b>         | <b>1001</b>          |
| edgeR                     | 2621               | 2536                 |
| <b>edgeR + C.N.</b>       | <b>582</b>         | <b>4290</b>          |
| <b>edgeR + RUVg</b>       | <b>109</b>         | <b>90</b>            |
| limma                     | 2603               | 2527                 |
| <b>limma + C.N.</b>       | <b>573</b>         | <b>4332</b>          |
| sleuth                    | 2529               | 2554                 |
| sleuth-ALR (trend)        | 2692               | 2225                 |
| <b>sleuth-ALR</b>         | <b>614</b>         | <b>4356</b>          |
| <b>Absolute Counts</b>    | <b>522</b>         | <b>5751</b>          |

300 **Table 1. Only compositional normalization (C.N.) accurately reflects global decrease in the yeast**  
301 **starvation study.** This table shows the number of hits identified by each tool using default settings and  
302 kallisto-calculated estimated counts and abundances. “Sleuth-ALR trend” used rqc1 (Pombase:  
303 SPAC1142.01) as a denominator; this gene had the most consistent abundance (TPM value) across all  
304 samples. The compositional normalization methods (all tools in red: “ALDEx2 ALR overlap”; “sleuth-ALR”; all  
305 “+C.N.” tools) used opt3 (Pombase: SPCC1840.12) as a denominator; this gene was considered a “validated  
306 reference gene”. “RUVg” for edgeR and DESeq2 (in blue) also used opt3 as a negative control gene. Only  
307 compositional normalization methods, using opt3, were able to accurately reflect the severe global decrease  
308 observed in the data, as shown by the number of genes showing down-regulation of the absolute counts. Note  
309 that ALDEx2 Welch and Wilcoxon statistics yielded <5 significant hits.

310

## 311 Discussion

312 Compositional normalization performed similarly to current normalization methods when there was only a small  
313 change to total RNA (**Fig 2A; Fig 4; Fig 5**). This similarity is expected because, in this scenario, it is valid to  
314 assume that most features are not changing. However, when there was a large change in global RNA,

315 compositional normalization using negative control features (spike-ins) had much better performance compared  
316 to the current normalization methods, for both simulated data (**Fig 2B-2C**) and real data (**Table 1**). In this case,  
317 the assumption held by the current methods is violated, and this is likely what greatly reduced their performance.  
318 Further, although the IQLR transformation in ALDEx2 was designed to be robust to large changes in global RNA,  
319 it only modestly improved performance. This indicates that at least some of the features it selected and assumed  
320 to be unchanging were indeed changing, in both the simulated data and the real data.

321 The worse performance of current normalization methods is likely related to how fold changes behave in the  
322 absolute case versus the relative case. Current normalization methods assume that most features are not  
323 changing; one could equivalently assume that the total RNA per cell is unchanged [23]. Thus, if the total RNA  
324 content changes, current methods will anchor the data on whatever this global change is. This results in a shift  
325 in the observed distribution of fold changes (see Supplementary Figure S16 of [4]). Extreme changes will still be  
326 observed to have the same direction, but there will be a group of features that are changing less dramatically  
327 than the global change that will be observed to have the wrong sign, and many unchanged features will appear  
328 to be changing.

329 Interestingly, the choice of normalization method had a much greater impact on performance than the choice of  
330 differential analysis tool, validating a finding from an older study [14]. This was true both for the simulated data  
331 (**Fig 2B-2C**) and for the yeast dataset (**Table 1**). In both cases, compositional normalization clearly outperformed  
332 current methods when analyzing a dataset with substantial changes to the total RNA content, whether simulated  
333 or real. However, this was only true when negative control features were used (**Table 1**). This indicates that the  
334 choice of tool is much less important than the choice of normalization and the availability of negative control  
335 features (spike-ins, validated reference gene) to properly anchor the data.

336 Surprisingly, RUVg had poor performance in both the simulated data and the experimental yeast dataset. It is  
337 unclear why this occurred, other than the likely possibility that it treats the data as count data rather than  
338 compositional data. More work would need to be done to see if RUVg could be modified to more accurately  
339 capture the global trend in the data from negative control features.

340 In our simulations, the total RNA content was either decreased by 33% or tripled, respectively. The overall  
341 change in the “up” study was less extreme than what was observed after c-Myc overexpression [24,39]. In that  
342 context, the researchers found a general transcriptional activation that was not captured by the traditional  
343 analysis of the RNA-Seq data, and required cell number normalization using spike-ins to see the overall trend  
344 of increasing gene expression; the total RNA content increase observed by RNA-Seq was ~5.5-fold (see Table  
345 S2 of [24]). The overall change in the “down” group was less extreme than that observed after the Marguerat et  
346 al dataset, which observed an 88% decrease total RNA content when using normalized RNA-Seq data. How  
347 often large shifts occur in real datasets is unclear because of how infrequently spike-ins or validated reference  
348 genes are used when generating data. Future work should determine more carefully how drastic composition  
349 changes need to be before performance starts to degrade for methods which assume that most features are not  
350 changing.

#### 351 Results from Bottomly et al. self-consistency test and GEUVADIS null experiment

352 Sleuth-ALR had the best self-consistency (**Fig 5**), and sleuth-ALR and limma had the best performance in the  
353 negative control dataset (**Fig 6**). ALDEx2 was unable to identify any hits using three samples per group with the  
354 standard statistical methods (Wilcoxon and Welch), and its “overlap” statistic showed a very high FDR, indicating  
355 that its results were inconsistent between the “training” and larger “validation” datasets. This indicates that  
356 ALDEx2 may not perform well when there are few replicates per group. While this manuscript was in preparation,  
357 a recent benchmarking study came to the same conclusion [31]. This behavior is likely due to the fact that the  
358 algorithm of ALDEx2 does not include any shrinkage of the variance. Variance shrinkage has been demonstrated  
359 to improve performance when there are few replicates [17,40,41]. Interestingly, though, all three statistics used  
360 by ALDEx2 had similar performance on the simulated data (**S3 Fig**), and the “overlap” statistic identified a similar  
361 set of hits in the real dataset as other compositional normalization methods (**Table 1**), suggesting that the  
362 “overlap” statistic may have utility in small datasets despite poor self-consistency or poor control of false positives  
363 in a negative control dataset. Future work could explore how to improve ALDEx2 performance for smaller  
364 datasets.



365

366 *The lack of real datasets with verified global changes*

367 It was difficult to identify an example of a real dataset, with clear-cut evidence of substantial changes to the total  
368 RNA content, that was also amenable to re-analysis using our pipeline. We were unable to re-analyze the  
369 previous data measuring the impact of c-Myc overexpression [24] because the RNA-Seq dataset did not have  
370 technical or biological replicates. We were also unable to re-analyze the selective growth assay used in the  
371 ALDEx2 paper [3] because the raw data, which is necessary for our pipeline, was not publicly available. Other  
372 datasets have used spike-ins, but had no other confirmatory data on the absolute copy numbers to confirm if the  
373 spike-ins accurately captured the global trend or not. This dearth of bulk RNA-Seq datasets with verified global  
374 changes speaks to how much the problem of neglecting to treat bulk RNA-Seq as compositional data has gone  
375 unrecognized in the community.

376

377 *How to choose a denominator for compositional normalization and interpret the results*

378 When using compositional normalization, regardless of which denominator is chosen, the interpretation of  
379 differential expression and fold-changes is "the change of feature X with respect to the denominator". Although  
380 all transformations are permutation invariant and therefore any chosen denominator will produce mathematically  
381 equivalent results [29], the choice of denominator has important implications for the interpretation of the results  
382 and for the downstream validation experiments.

383 If an experimenter has information about absolute copy numbers per cell in their experiment, they can readily  
384 use that information with compositional normalization. For example, if spike-ins are included proportional to the  
385 number of cells, as recommended in the c-Myc study [24], those spike-ins can be used as the denominator. If  
386 one or more reference genes are validated, as was done with the Yeast Starvation study [26], then a reference  
387 gene known to be approximately constant under the experimental conditions can be used. In principle, if qPCR  
388 is used to validate differential analysis results in this scenario, a predicted reference gene after using spike-ins

389 or the validated reference gene used for compositional normalization would be the best choice for a reference  
390 gene.

391 What about experiments that do not have spike-ins or validated reference genes? Spike-ins have only slowly  
392 been adopted as a part of \*Seq protocols [28]. It has further been extensively documented that reference genes  
393 are frequently not properly validated [42], and that expression of commonly used reference genes could change  
394 dramatically under certain circumstances [43,44]. There have been several techniques to identify reference  
395 genes using RNA-Seq data [45-47]. Importantly, these techniques all find a feature that has an approximately  
396 constant proportion throughout all of the samples. However, researchers are usually attempting to identify a  
397 reference gene with approximately constant absolute copy numbers per cell throughout. In order to draw this  
398 conclusion, the techniques must make the same assumption that standard RNA-Seq analysis tools make, i.e.  
399 that the global RNA content remains constant in all samples, or that only a few features are differentially  
400 expressed. If many features are changes, features identified by these tools will only reflect the global change  
401 (up or down), rather than being approximately constant in absolute copy numbers per cell.

402 None of the compositional normalization methods solve this problem (for an example, see sleuth-ALR with the  
403 “trend” feature compared to the other methods in **Table 1**), because no tool can *in principle* solve this problem  
404 without access to external information. As described in a recent review article [5], no approach can formally  
405 recapitulate the absolute data, and only approaches that are using truly constant features can adequately anchor  
406 the data to accurately estimate the true changes in the absolute data. In most datasets without spike-ins or  
407 validated reference genes, it is unknown if there is a significant change in the total RNA per cell. Thus, all that  
408 is left is how one feature behaves relative to another feature.

409 When one feature is used, there is a clear advantage to compositional normalization versus current methods  
410 because there is a clear interpretation of the results (i.e. how features are behaving relative to this feature), and  
411 because there would be a clear choice of reference gene for any qPCR validation downstream (for example,  
412 *spp1* would be used in the yeast starvation study). Any other choice for qPCR reference gene would likely yield  
413 discordant results. Importantly, though, identifying a feature with approximately constant proportion, in the

414 absence of information about the overall changes in RNA content, can still help experimenters identify important  
415 biology. This is analogous to the approach taken by Gene Set Enrichment Analysis (GSEA) [48]. Its “competitive”  
416 null hypothesis leads to the identification of gene sets or pathways that are behaving differently with respect to  
417 the general trend of expression changes across the whole genome [49]. GSEA’s approach has led to uncovering  
418 interesting biology in the past, as demonstrated by how frequently it has been used and cited.

419 In the context of RNA-Seq differential analysis, most datasets will be restricted to this option, and thus  
420 experiments will be forced to sacrifice knowledge about the absolute copy numbers for an interpretation of the  
421 data anchored to whatever the global change is. This should alarm researchers conducting these experiments  
422 to recognize the limitations of the current methodologies. This should also push the community to call for  
423 technical innovation and standardization that will make more widespread both the use of spike-ins for  
424 normalization, and the validation of reference genes specific to the experiment at hand. Furthermore, this issue  
425 regarding the compositional nature of the data is not limited to RNA-Seq, but to many if not all high-throughput  
426 (“omics”) techniques (see Note 4 in **Supporting Information**).

427

#### 428 Concerns about the utility of spike-ins

429 The authors of RUVg [27] made two observations that raised concerns about the utility of spike-ins. However,  
430 when interpreting the spike-in abundances through the lens of compositional data analysis, the observed  
431 behavior of spike-ins is precisely what would be expected (See Note 3 in **Supporting Information**). In particular,  
432 systematic variation between conditions in the spike-in abundances is expected if there is a global change (**Fig**  
433 **3; S5 Fig; S4 Table**). This was observed in the yeast dataset, with the validated reference gene have a greatly  
434 increased abundance in the nitrogen starved cells versus control cells.

435 However, their other observation raises valid concerns about the current protocol for using spike-ins. They  
436 observed a global discrepancy between spike-ins and the rest of the genes when comparing two control libraries  
437 to each other (see Figure 4d of [27]). This could be partially explained by dropout effects, but is most likely due  
438 to differences in non-poly-adenylated RNA expression (especially rRNA) between the samples. The way that

439 the spike-ins were added in their experiment (adding an equal amount to approximately equal aliquots of the  
440 total RNA) causes the spike-ins to also be subject to compositional changes (**S5 Table**). For bulk RNA-Seq  
441 experiments, the standard protocol adds spike-ins to equal amounts of RNA after isolation and selection (poly-  
442 A selection or rRNA-depletion), but if there are changes in the excluded RNAs, this protocol impedes the ability  
443 of the spike-ins to accurately capture the true fold changes of the RNAs under consideration. In contrast, the  
444 approach advocated by Lovén et al [24] was to add spike-ins before RNA isolation, in proportion to the number  
445 of cells. With this approach, the spike-ins can, in principle, accurately capture the behavior of the genes, even  
446 when there are non-poly-adenylated RNA changes (**S6 Table**). There are challenges with using spike-ins in  
447 complex tissues [23], and there may be technical biases that affect spike-ins differently from endogenous RNAs,  
448 but further work must clarify this. What is certain is that future work with spike-ins absolutely must keep in mind  
449 the compositional nature of the data being generated, and protocols for bulk RNA-Seq may need to be revised  
450 to improve the chance of spike-ins accurately anchoring the data to copy numbers.

451

## 452 Conclusions

453 In summary, simulating RNA-Seq data using a compositional approach more closely aligns with the kind of data  
454 being generated in RNA-Seq. Compositional normalization using negative control features yields a significant  
455 improvement over previous methods, in that it performs best in experimental contexts where the composition  
456 changes substantially. Importantly, this method can still be safely used in contexts where the compositional  
457 changes are unknown. There is much potential to extend the principles of compositional data analysis to other  
458 “omics” approaches, since they all generate compositional data; one intriguing possibility is a normalization free  
459 method that examines “differential proportionality” [50]. However, our results from simulation and from real  
460 datasets demonstrate that, without access to spike-ins or to validated reference features, a researcher is limited  
461 in what conclusions can be drawn from \*Seq data because of the compositional nature of the data. This work  
462 also makes a strong case for there to be more effort to improve and standardize the use of spike-in controls and  
463 validated reference features in all “omics” experiments.

464

## 465 **Materials and methods**

### 466 ***absSimSeq approach to simulating RNA-Seq data***

467 See **Fig 1** for a summary diagram of our protocol for **absSimSeq**. When generating RNA-Seq data, the key  
468 experimental step which requires a compositional approach is when the actual changes in the RNA content are  
469 sampled using an equal but arbitrary amount of RNA by the library preparation process, resulting in a dataset of  
470 proportions. To simulate this shift from count data to compositional data, the **absSimSeq** protocol starts with a  
471 set of transcripts and their TPMs, either defined by the user or estimated from real data. It then conceptually  
472 shifts from considering transcripts per million (a proportion) to considering copy numbers per cell, i.e. the number  
473 of transcripts present in each cell (the absolute count unit of interest). It then simulates the fold changes expected  
474 to occur between groups directly on the copy numbers, which may or may not result in a substantial change in  
475 the total RNA per cell. The next key step is then converting these new expected copy numbers back to TPMs to  
476 represent the expected proportion of each transcript that would be present in an equal aliquot taken from each  
477 group. These new TPMs are then converted to expected counts per transcript based on their lengths and the  
478 desired library sequencing depth, and those expected counts, along with user-defined or estimated parameters  
479 for variance within each group, are then submitted to the R package **polyester** to simulate an RNA-Seq  
480 experiment.

481 **AbsSimSeq** also has the option to add spike-ins to the simulated experiment. In our studies, the ERCC ExFold  
482 Spike-in mixes are used to define which sequences are included and in what proportions. The user can define  
483 what percentage of the transcripts should be coming from spike-ins and which mix to use.

### 484 *Simulation of copy numbers for this study*

485 To model a simulated dataset after real data, we took an approach modified from Patro et al [10] and Pimentel  
486 et al [13]. To estimate the mean and variance for the control group for our simulation, we wished to use a  
487 population without expected biological changes within the group. We thus used as a proxy the largest

488 homogeneous population in the GEUVADIS data set, a set of 58 lymphoblastoid cell lines taken from Finnish  
489 women. We estimated transcript abundances using kallisto and human Gencode v. 25 transcripts (Ensembl v.  
490 87), and then estimated negative binomial parameters (the Cox-Reid dispersion parameter) using DESeq2. We  
491 next took the mean TPMs from this dataset, for input into **absSimSeq**.

492 Three simulation studies were performed, with five simulation experiments in each study. The “small” study was  
493 intended to simulate experiments where there was no substantial change in the copy numbers per cell per group.  
494 The “down” and “up” studies were designed to simulate experiments where there was a large compositional  
495 shift, with the total copy numbers either decreasing or increasing.

496 To simulate differential expression, we first applied a filter where the transcript had to have a TPM value of at  
497 least 1. We then randomly and independently assigned each filtered transcript as either not changing (i.e. fold-  
498 change of 1) or differentially expressed, using a Bernoulli trial with varying probability of success (5% of all  
499 transcripts for the “small” study; 20% for the “down” and “up” studies). For each differentially expressed  
500 transcript, a truncated normal distribution was used to simulate the fold change, with a mean of 2-fold, a standard  
501 deviation of 2, and a floor of 1.5-fold. A Bernoulli trial was then used to choose either up-regulation or down-  
502 regulation with varying probability of success (70% down for the “small” study, chosen to produce roughly equal  
503 total RNA in each group; 90% down for the “down” study; 90% up for the “up” study).

504 The estimated null distribution and the simulated fold changes thus defined the mean copy numbers per cell for  
505 the control group and the experimental group, respectively. These copy numbers were then converted back to  
506 TPM. Because TPM is proportional to the estimated counts divided by effective length [13], the TPMs were  
507 multiplied by the effective lengths and then normalized by the sum to get the expected proportion of reads per  
508 transcript per condition. This was then multiplied by a library size of 30 million reads to get the expected reads  
509 per transcript per condition. This matrix of expected reads and the Cox-Reid dispersion parameters estimated  
510 from the GEUVADIS dataset were used as input for the **polyester** package [32] to simulate 5 samples in each  
511 group, with a random variation of about 2-3% introduced into the exact sequencing depth used. The dispersion

512 parameters for the spike-ins was set to the median dispersion of all transcript that had a mean TPM within 5%  
513 of the TPM for the spike-in.

514 **S1 Table** summarizes the simulation parameters and the number of transcripts that are differentially expressed,  
515 and **S2 Table** shows the average global copy numbers per cell per condition for each of the fifteen runs. Note  
516 that the experimental group in the “up” study had a ~2.8-fold increase, on average, in the total RNA copy  
517 numbers per cell. This is less than the 5.5-fold increase in total mRNA observed after over-expressing the  
518 oncogene c-Myc (See the normalized data in Table S2 in Lovén et al., 2012)). The experimental group in the  
519 “down” study had a ~33% decrease in the total RNA copy numbers per cell. This is less than the decrease in  
520 total RNA observed in the yeast dataset (See Supplementary Table S2 from [26]).

521

## 522 Implementing a compositional approach for differential analysis tools: the Log-ratio transformation

523 To allow tools to use negative control features, like spike-ins or validated reference genes, in a compositional  
524 manner, we present a method that uses what is called the “additive log-ratio” (ALR) transformation. This was  
525 proposed by John Aitchison to address problems analyzing compositional data. He demonstrated that any  
526 meaningful function of compositions must use ratios [29]. Further, he proposed the use of log-ratios to avoid the  
527 statistical difficulty arising from using raw ratios. ALR is the simplest of the transformations proposed by Aitchison  
528 and others in the field of Compositional Data Analysis. In ALR, if there are D components in a composition, then  
529 the D-th component is used as the denominator for all of the other D-1 components.

530 Formally, if T is a set of D transcripts, then  $x = \{x_t\}_{t \in T}$  defines the relative abundance of the t-th transcript in  
531 the composition, with  $\sum_{t=1}^D x_t = C$ , where C is some arbitrary constant (e.g. 1 million for TPMs). These relative  
532 abundances are proportional to the units commonly used in RNA-Seq (RPKM, TPM, etc) [18]. The ALR  
533 transformation takes a component to be used as the denominator, analogous to the “reference gene” used in  
534 qPCR experiments (see “How to interpret the results” below). This forms a new set of D – 1 transformed log-  
535 ratios,

536

$$\log_2 \frac{x_1}{x_D}, \log_2 \frac{x_2}{x_D}, \dots, \log_2 \frac{x_{D-1}}{x_D}$$

537

538 that can then be used for downstream statistical analyses. If one wishes to use a collection of features (e.g. a  
539 panel of validated reference genes; a pool of spike-ins), then the geometric mean,  $g(x)$ , of those multiple  
540 features can be used on all D components:

541

$$\log_2 \frac{x_1}{g(x)}, \log_2 \frac{x_2}{g(x)}, \dots, \log_2 \frac{x_D}{g(x)}$$

542 If this is a subset of features, this is called the “multi-additive log-ratio” (malr) [31]. If the geometric mean of all  
543 of the features are used, this is the “centered log-ratio” (CLR) transformation introduced by Aitchison and is used  
544 in the default mode of ALDEx2 [3]. These are all options available for use in sleuth-ALR.

545 Log-ratio transformations are undefined if either the numerator or denominator is zero. **Sleuth-ALR** has  
546 implemented an imputation procedure for handling zeros that minimizes any distortions on the dependencies  
547 within the composition. See Note 5 of **Supporting Information** for more details.

548

#### 549 *How to choose a denominator for compositional normalization and how to interpret the results*

550 The proposed interpretation of the results generated by **sleuth-ALR** is simple: whatever the denominator is, the  
551 results show how all the other features change relative to that feature or features. For example, if GAPDH is  
552 selected as the reference feature, the results show how every other gene is changing relative to GAPDH.

553 Thus, if there are one or more features which are known *a priori* to be negative controls—a validated reference  
554 gene, a pool of spike-ins—these are natural choices for use as a denominator in **sleuth-ALR**, either using a  
555 single feature, or using the geometric mean of multiple features. Since the copy numbers of these features are  
556 expected to be constant between samples, there is now an anchor for the relative proportions between samples.



557 If negative controls are unavailable, we propose identifying one or more features that have the most consistent  
558 proportion across all samples. For **sl euth-ALR**, we chose the coefficient of variation as the metric to measure  
559 consistency in proportion. Without external information, though, it is unknown if this “consistent feature” is indeed  
560 also consistent in copy numbers. If there is a global change in RNA content, this feature would represent the  
561 average change. All current normalization methods assume there is no such change, and so make corrections  
562 to the data to remove any perceived change; they are therefore mathematically equivalent to this proposed  
563 approach (see [5] for a full mathematical proof). However, this approach has the advantage of making explicit  
564 the implicit and necessary interpretation (how are features changing relative to the selected reference  
565 feature(s)?). It also provides a feature or set of features that can be used as a reference gene for follow-up  
566 validation.

567

#### 568 How sleuth-ALR fits into the current sleuth pipeline

569 See **S1 Fig** for the pipeline and how it compares to the current pipeline. In the current sleuth pipeline, estimated  
570 counts of transcripts from kallisto or salmon are first normalized by the DESeq2 median-of-ratios method [16],  
571 and then transformed on the natural log scale with a 0.5-fragment offset to prevent taking the logarithm of zero  
572 and to reduce the variability of low-abundance transcripts [13,17]. With the additive log-ratio transformation, the  
573 size factor is replaced by the estimated expression of the chosen denominator, and the offset is replaced by the  
574 imputation procedure. Once a denominator is chosen, zero values are imputed, the ratios between each feature  
575 and the denominator is calculated, and the data is then transformed on a log scale, which can then be used  
576 directly in the sleuth model. Our implementation simply replaces the current normalization and transformation  
577 functions with the function provided by the **sl euth-ALR** package. For ease of interpretation, the modeling can  
578 be done on TPMs directly (using the *which\_var* argument for *sl euth\_fit*), though the previous choice of modeling  
579 the estimated counts can also be used.

580

#### 581 Compositional approach for the other tools

582 **ALDEx2** has an explicitly compositional approach, and it solves the imputation problem by simulating bootstraps  
583 on the data using the Dirichlet-multinomial distribution, which will never yield zero values. It then calculates  
584 estimated statistics by examining the differences between groups within each bootstrap. Its default option is to  
585 use the CLR transformation, but it has several options for other choices of denominator. A recent paper  
586 examined **ALDEx2**'s performance using these different options [31]; and its results suggested that the IQLR  
587 (“interquartile range log-ratio transformation”) provided the best balance of performance across real and  
588 simulated datasets, with respect to accuracy and computer time. This transformation uses the subset of all  
589 features that, after using the CLR transformation, have a sample-wise variance in the interquartile range.  
590 Theoretically, this transformation is robust to many features changing either up or down. This and the CLR  
591 transformation were used as the normalization methods tested in our study. It can also take a predefined subset  
592 of features and uses the geometric mean of those features within each sample; this was the approach taken  
593 when utilizing spike-ins for compositional normalization.

594 **DESeq2** uses the median-of-ratios method [16]. If one wishes to calculate a single size factor to normalize each  
595 sample, it is calculated by the *estimateSizeFactors* function. This function has a *controlGenes* option, which  
596 allows the user to define a set of features that are expected to have constant expression across all samples. A  
597 recent review demonstrated that the DESeq2 size factor is mathematically equivalent to the compositional log-  
598 ratio proposed by Aitchison [5]. If a dataset has known negative control features (e.g. spike-ins), these can be  
599 used to calculate a DESeq2 size factor similar to what is calculated by **sleuth-ALR** or **ALDEx2**. For **DESeq2**,  
600 **edgeR**, and **limma**, we calculated DESeq2 size factors using the *estimateSizeFactors* function with designated  
601 negative control features (spike-ins for the simulated data; a validated reference gene for the yeast starvation  
602 dataset).

603

#### 604 *Pipeline to analyze simulations*

605 The simulated data (FASTA files) were analyzed by **kallisto** for downstream use by all of the tools tested. Spike-  
606 ins from ERCC Spike-in Mix 1 were included for the simulations (2% of the total RNA), and so were used as the

607 set of features known to have constant expression between samples. Previous studies observed that only highly  
608 expressed spike-ins had consistent ratios across samples [33,34]. Thus, we selected spike-ins that had an  
609 average log<sub>2</sub> concentration of at least 3 between both mixes. This filter results in a set of 47 spike-ins that were  
610 used for compositional normalization and for **RUVg** from **RUVSeq**. **RUVg** was used with **DESeq2** and **edgeR**  
611 to test its ability to use spike-in information using its own approach.

612 Filtering is an important issue for managing the accuracy of estimation. Different pipelines make different  
613 decisions about what features to filter. To allow the tools to be compared fairly, the same set of filtered transcripts  
614 were tested in all tools, defined by those transcripts that passed the standard sleuth filter of having at least 5  
615 estimated counts in at least half of the samples. DESeq2's default functionality to use independent filtering and  
616 Cooks' outlier filtering did not significantly impact its performance on the simulated data (data not shown), so  
617 these were left on.

618

### 619 Experiments from the original sleuth paper

620 To see if compositional normalization would produce similar results with fewer replicates, we repeated the self-  
621 consistency experiment as described in the sleuth paper [13]. Briefly, we used the Bottomly et al dataset [35],  
622 randomly split the 21 samples into a small training dataset consisting of 3 samples in each condition, and a large  
623 validation dataset consisting of remaining samples. The "truth" set of features was defined by the hits identified  
624 in the larger validation dataset. This was repeated 20 times. At each of three FDR levels (0.01, 0.05, 0.1), we  
625 compared the smaller dataset against the larger dataset, and plotted the estimated FDR and sensitivity relative  
626 to sleuth-ALR. Since spike-ins were not used in this experiment, and it is unknown if there was any significant  
627 change in the total RNA between the groups, the denominator for compositional normalization was chosen  
628 based on which feature had the lowest coefficient of variation across the whole dataset. Zfp106-201  
629 (ENSMUST00000055241.12 in Ensembl v. 87) was used as the denominator for **sleuth-ALR** in all datasets.  
630 This was also used for RUVg. The IQLR transformation was used for ALDEx2, and otherwise the current  
631 normalization methods from the original sleuth paper were used.

632 To test the performance of compositional normalization when analyzing a negative control dataset, we also  
633 repeated the null resampling experiment as described in the sleuth paper [13]. Briefly, we used the Finnish  
634 samples from the GEUVADIS dataset, and randomly subsampled the data into twenty null experiments with 3  
635 samples in two groups. This subsampling was stratified by lab to minimize technical variability that may have  
636 occurred between labs. Because of the homogeneous population and minimized technical variation, the  
637 expectation is that there would be zero differentially expressed features. The null experiments were analyzed,  
638 and the number of false positives was plotted at the transcript-level and gene-level. The same denominator was  
639 used for compositional normalization in **sleuth-ALR** across all twenty of the null experiments: SRSF4-201  
640 (ENST00000373795.6) for the transcript-level and SRSF4 (ENSG00000116350) for the gene-level. This  
641 transcript and gene were determined to have the respective lowest coefficient of variation across all of the  
642 samples used for this experiment.

643

#### 644 Pipeline to analyze yeast dataset

645 To test the different tools and normalization approaches on a real dataset, we chose a well-characterized “yeast  
646 starvation” dataset [26]. In this dataset, yeast were cultured in two conditions: (1) freely proliferating using  
647 Edinburgh Minimal Medium; (2) the same medium without a nitrogen source (NH<sub>4</sub>Cl), resulting in the cells  
648 reversibly arresting into a quiescent state. Two samples from each condition were processed for poly-A selected  
649 RNA-Seq or for total RNA (no selection or depletion step). A collection of 49 mRNAs were selected for absolute  
650 quantification using the Nanostring nCounter, which uses a fluorescent tagging protocol to digitally count mRNA  
651 molecules without the need for RNA purification. The results were normalized to external RNA controls to  
652 estimate copy numbers per cell of each mRNA. We used the absolute counts summarized in Supplementary  
653 Table S2 of [26] as a basis for selecting opt3 (Pombase: SPCC1840.12.1) as the gene with the smallest  
654 coefficient of variation for estimated absolute counts among all samples. This can be considered a validated  
655 reference gene. Thus, it was used with methods utilizing negative control features (**sleuth-ALR**, **RUVg**, and  
656 other tools using **DESeq2**'s estimateSizeFactors with controlGenes argument) to normalize the data. **Sleuth-**

657 **ALR** was also tested using *rqc1* (Pombase: SPAC1142.01.1), which was selected as having the smallest  
658 coefficient of variation for raw abundances (TPM values) across all the samples. This gene represents the  
659 “average global trend” or “average global change” in the data, as discussed in “How to choose a denominator”  
660 section above.

661 To re-analyze the RNA-Seq data, we downloaded the *Schizosaccharomyces pombe* genome cDNA FASTA file  
662 from <ftp.ensemblgenomes.org> (Fungi release 37). This was used as the reference for generating the kallisto  
663 index. Each tool was then run using default settings.

664

## 665 **Declarations**

### 666 *Availability of data and code*

667 The yeast starvation dataset was taken from Marguerat et al [26] from ArrayExpress at accession E-MTAB-  
668 1154, and the absolute counts were taken from Supplementary Table S2 from [26]. The GEUVADIS Finnish  
669 data can be found at ArrayExpress using accession E-GEUV-1, using the samples with the population code  
670 “FIN” and sex “female”. The Bottomly et al data [35] can be found on the Sequence Read Archive (SRA) using  
671 the accession SRP004777. Human annotations were taken from Gencode v. 25 and Ensembl v. 87, mouse  
672 annotations were taken from Gencode v. M12 and Ensembl v. 87, and yeast annotations were taken from  
673 Ensembl Genomes Fungi release 37. The code and vignette for **absSimSeq** can be found on GitHub at  
674 [www.github.com/warrenmcbg/absSimSeq](http://www.github.com/warrenmcbg/absSimSeq), the code and vignette for using sleuth-ALR can be found at  
675 [www.github.com/warrenmcbg/sleuth-ALR](http://www.github.com/warrenmcbg/sleuth-ALR), and the full code to reproduce the analyses in this paper can be found  
676 at [www.github.com/warrenmcbg/sleuthALR\\_paper\\_analysis](http://www.github.com/warrenmcbg/sleuthALR_paper_analysis). Here are the versions of each of the software used:  
677 **kallisto** v. 0.44.0, **limma** v. 3.34.9, **edgeR** v. 3.20.9, **RUVSeq** 1.12.0, and **DESeq2** 1.18.1; the version of  
678 **polyester** used is a forked branch that modified version 1.14.1 with significant speed improvements (found here:  
679 [www.github.com/warrenmcbg/polyester](http://www.github.com/warrenmcbg/polyester)); the version of **sleuth** used is a forked branch that modified version  
680 0.29.0 with speed improvements and modifications to allow for **sleuth-ALR** (found here:  
681 [www.github.com/warrenmcbg/sleuth/tree/speedy\\_fit](http://www.github.com/warrenmcbg/sleuth/tree/speedy_fit)); the version of **ALDEx2** used is a forked branch that

682 modified version 1.10.0 to make some speed improvements and to fix a bug that prevented getting effects if the  
683 ALR transformation with one feature was used (found here: [www.github.com/warrenmcg/ALDEx2](http://www.github.com/warrenmcg/ALDEx2)). All R code  
684 was run using R version 3.4.4, and the full pipeline was run using snakemake.

685

#### 686 *Funding*

687 WAM and JYW are supported by the NIH (F30 NS090893 to WAM; R01CA175360 and RO1NS107396 to JYW).  
688 HP is supported by the Howard Hughes Medical Institute Hanna Gray Fellowship.

689

#### 690 *Author's Contributions*

691 WAM conceived the idea, designed the approach, and wrote the software for sleuth-ALR and absSimSeq. WAM  
692 and HP wrote the code for the analysis pipeline. JYW and LP provided supervision. WAM and JYW wrote the  
693 manuscript.

694

#### 695 **Acknowledgments**

696 We are grateful to Rosemary Braun and David Kuo for helpful suggestions and critical reading of the manuscript.

697

#### 698 **Competing Interests**

699 The authors declare no competing financial interests.

700

#### 701 **References**

- 702 1. Huang H-C, Niu Y, Qin L-X. Differential Expression Analysis for RNA-Seq: An Overview of Statistical  
703 Methods and Computational Software. *Cancer Informatics*. SAGE PublicationsSage UK: London,  
704 England; 2015;14: 57–67. doi:10.4137/CIN.S21631
- 705 2. Lovell D, Müller W, Taylor J, Zwart A, Helliwell C. Proportions, Percentages, PPM: Do the Molecular  
706 Biosciences Treat Compositional Data Right? In: Pawlowsky-Glahn V, Buccianti A, editors.  
707 Compositional Data Analysis. Chichester, UK: John Wiley & Sons, Ltd; 2011. pp. 191–207.  
708 doi:10.1002/9781119976462.ch14
- 709 3. Fernandes AD, Reid JN, Macklaim JM, McMurrough TA, Edgell DR, Gloor GB. Unifying the analysis of  
710 high-throughput sequencing datasets: characterizing RNA-seq, 16S rRNA gene sequencing and  
711 selective growth experiments by compositional data analysis. *Microbiome* 2014 2:1. BioMed Central;  
712 2014;2: 15. doi:10.1186/2049-2618-2-15
- 713 4. Lovell D, Pawlowsky-Glahn V, Egozcue JJ, Marguerat S, Bähler J. Proportionality: A Valid Alternative  
714 to Correlation for Relative Data. *PLoS Computational biology*. Public Library of Science; 2015;11:  
715 e1004075. doi:10.1371/journal.pcbi.1004075
- 716 5. Quinn TP, Erb I, Richardson MF, Crowley TM. Understanding sequencing data as compositions: an  
717 outlook and review. Wren J, editor. *Bioinformatics* (Oxford, England). 2018;34: 2870–2878.  
718 doi:10.1093/bioinformatics/bty175
- 719 6. Gloor GB, Macklaim JM, Pawlowsky-Glahn V, Egozcue JJ. Microbiome Datasets Are Compositional:  
720 And This Is Not Optional. *Front Microbiol*. Frontiers; 2017;8: 57. doi:10.3389/fmicb.2017.02224
- 721 7. Zhao Q-Y, Gratten J, Restuadi R, Li X. Mapping and differential expression analysis from short-read  
722 RNA-Seq data in model organisms. *Quant Biol*. Higher Education Press; 2016;4: 22–35.  
723 doi:10.1007/s40484-016-0060-7

- 724 8. Conesa A, Madrigal P, Tarazona S, Gomez-Cabrero D, Cervera A, McPherson A, et al. A survey of  
725 best practices for RNA-seq data analysis. *Genome Biology*. 2016;17: 13. doi:10.1186/s13059-016-  
726 0881-8
- 727 9. Bray NL, Pimentel H, Melsted P, Pachter L. Near-optimal probabilistic RNA-seq quantification. *Nature*  
728 *Biotechnology*. 2016;34: 525–527. doi:10.1038/nbt.3519
- 729 10. Patro R, Duggal G, Love MI, Irizarry RA, Kingsford C. Salmon provides fast and bias-aware  
730 quantification of transcript expression. *Nature Methods*. 2017;14: 417–419. doi:10.1038/nmeth.4197
- 731 11. Patro R, Mount SM, Kingsford C. Sailfish enables alignment-free isoform quantification from RNA-seq  
732 reads using lightweight algorithms. *Nature Biotechnology*. Nature Publishing Group; 2014;32: 462–464.  
733 doi:10.1038/nbt.2862
- 734 12. Sonesson C, Delorenzi M. A comparison of methods for differential expression analysis of RNA-seq  
735 data. *BMC Bioinformatics*. 2013;14: 91. doi:10.1186/1471-2105-14-91
- 736 13. Pimentel H, Bray NL, Puente S, Melsted P, Pachter L. Differential analysis of RNA-seq incorporating  
737 quantification uncertainty. *Nature Methods*. 2017;14: 687–690. doi:10.1038/nmeth.4324
- 738 14. Bullard JH, Purdom E, Hansen KD, Dudoit S. Evaluation of statistical methods for normalization and  
739 differential expression in mRNA-Seq experiments. *BMC Bioinformatics*. BioMed Central; 2010;11: 94.  
740 doi:10.1186/1471-2105-11-94
- 741 15. Robinson MD, Oshlack A. A scaling normalization method for differential expression analysis of RNA-  
742 seq data. *Genome Biology*. 2010;11: R25. doi:10.1186/gb-2010-11-3-r25
- 743 16. Anders S, Huber W. Differential expression analysis for sequence count data. *Genome Biology*.  
744 BioMed Central; 2010;11: R106. doi:10.1186/gb-2010-11-10-r106
- 745 17. Law CW, Chen Y, Shi W, Smyth GK. voom: Precision weights unlock linear model analysis tools for  
746 RNA-seq read counts. *Genome Biology*. 2014;15: R29. doi:10.1186/gb-2014-15-2-r29



- 747 18. Pachter L. Models for transcript quantification from RNA-Seq. 2011. arXiv:1104.3889v2
- 748 19. Robinson MD, Smyth GK. Moderated statistical tests for assessing differences in tag abundance.  
749 Bioinformatics (Oxford, England). Oxford University Press; 2007;23: 2881–2887.  
750 doi:10.1093/bioinformatics/btm453
- 751 20. Trapnell C, Williams BA, Pertea G, Mortazavi A, Kwan G, van Baren MJ, et al. Transcript assembly and  
752 quantification by RNA-Seq reveals unannotated transcripts and isoform switching during cell  
753 differentiation. Nature Biotechnology. Nature Publishing Group; 2010;28: 511–515.  
754 doi:10.1038/nbt.1621
- 755 21. Li B, Dewey CN. RSEM: accurate transcript quantification from RNA-Seq data with or without a  
756 reference genome. BMC Bioinformatics. BioMed Central; 2011;12: 1. doi:10.1186/1471-2105-12-323
- 757 22. Chen K, Hu Z, Xia Z, Zhao D, Li W, Tyler JK. The Overlooked Fact: Fundamental Need for Spike-In  
758 Control for Virtually All Genome-Wide Analyses. Molecular and Cellular Biology. American Society for  
759 Microbiology; 2015;36: 662–667. doi:10.1128/MCB.00970-14
- 760 23. Evans C, Hardin J, Stoebel DM. Selecting between-sample RNA-Seq normalization methods from the  
761 perspective of their assumptions. Briefings in Bioinformatics. Oxford University Press; 2018;19: 776–  
762 792. doi:10.1093/bib/bbx008
- 763 24. Lovén J, Orlando DA, Sigova AA, Lin CY, Rahl PB, Burge CB, et al. Revisiting Global Gene Expression  
764 Analysis. Cell. 2012;151: 476–482. doi:10.1016/j.cell.2012.10.012
- 765 25. Shippy R, Fulmer-Smentek S, Jensen RV, Jones WD, Wolber PK, Johnson CD, et al. Using RNA  
766 sample titrations to assess microarray platform performance and normalization techniques. Nature  
767 Biotechnology. 2006;24: 1123–1131. doi:10.1038/nbt1241

- 768 26. Marguerat S, Schmidt A, Codlin S, Chen W, Aebersold R, Bähler J. Quantitative analysis of fission  
769 yeast transcriptomes and proteomes in proliferating and quiescent cells. *Cell*. 2012;151: 671–683.  
770 doi:10.1016/j.cell.2012.09.019
- 771 27. Risso D, Ngai J, Speed TP, Dudoit S. Normalization of RNA-seq data using factor analysis of control  
772 genes or samples. *Nature Biotechnology*. Nature Publishing Group; 2014;32: 896–902.  
773 doi:10.1038/nbt.2931
- 774 28. Hardwick SA, Deveson IW, Mercer TR. Reference standards for next-generation sequencing. *Nature*  
775 *Reviews Genetics*. Nature Research; 2017;18: 473–484. doi:10.1038/nrg.2017.44
- 776 29. Aitchison J. The single principle of compositional data analysis, continuing fallacies, confusions and  
777 misunderstandings and some suggested remedies. Daunis-i-Estadella J, Martín-Fernández JA, editors.  
778 Proceedings of CoDAWork'08, The 3rd Compositional Data Analysis Workshop. Universitat de Girona.  
779 Departament d'Informàtica i Matemàtica Aplicada; 2008.
- 780 30. van den Boogaart KG, Tolosana-Delgado R. Fundamental Concepts of Compositional Data Analysis.  
781 Analyzing Compositional Data with R. Berlin, Heidelberg: Springer, Berlin, Heidelberg; 2013. pp. 13–  
782 50. doi:10.1007/978-3-642-36809-7\_2
- 783 31. Quinn TP, Crowley TM, Richardson MF. Benchmarking differential expression analysis tools for RNA-  
784 Seq: normalization-based vs. log-ratio transformation-based methods. *BMC Bioinformatics*. BioMed  
785 Central; 2018;19: 274. doi:10.1186/s12859-018-2261-8
- 786 32. Frazee AC, Jaffe AE, Ben Langmead, Leek JT. Polyester: simulating RNA-seq datasets with differential  
787 transcript expression. *Bioinformatics (Oxford, England)*. 2015;17. doi:10.1093/bioinformatics/btv272
- 788 33. SEQC MAQC-III Consortium. A comprehensive assessment of RNA-seq accuracy, reproducibility and  
789 information content by the Sequencing Quality Control Consortium. *Nature Biotechnology*. Nature  
790 Publishing Group; 2014;32: 903–914. doi:10.1038/nbt.2957

- 791 34. Munro SA, Lund SP, Pine PS, Binder H, Clevert D-A, Conesa A, et al. Assessing technical  
792 performance in differential gene expression experiments with external spike-in RNA control ratio  
793 mixtures. *Nature Communications*. 2014;5: 5125. doi:10.1038/ncomms6125
- 794 35. Bottomly D, Walter NAR, Hunter JE, Darakjian P, Kawane S, Buck KJ, et al. Evaluating Gene  
795 Expression in C57BL/6J and DBA/2J Mouse Striatum Using RNA-Seq and Microarrays. Zhuang X,  
796 editor. *PLoS ONE*. Public Library of Science; 2011;6: e17820. doi:10.1371/journal.pone.0017820
- 797 36. Lappalainen T, Sammeth M, Friedländer MR, 't Hoen PAC, Monlong J, Rivas MA, et al. Transcriptome  
798 and genome sequencing uncovers functional variation in humans. *Nature*. 2013;501: 506–511.  
799 doi:10.1038/nature12531
- 800 37. Yanagida M. Cellular quiescence: are controlling genes conserved? *Trends in Cell Biology*. Elsevier  
801 *Current Trends*; 2009;19: 705–715. doi:10.1016/j.tcb.2009.09.006
- 802 38. Kulkarni MM. *Digital Multiplexed Gene Expression Analysis Using the NanoString nCounter System*.  
803 Hoboken, NJ, USA: John Wiley & Sons, Inc; 2001. pp. 25B.10.1–25B.10.17.  
804 doi:10.1002/0471142727.mb25b10s94
- 805 39. Lin CY, Lovén J, Rahl PB, Paranal RM, Burge CB, Bradner JE, et al. Transcriptional Amplification in  
806 Tumor Cells with Elevated c-Myc. *Cell*. Elsevier; 2012;151: 56–67. doi:10.1016/j.cell.2012.08.026
- 807 40. Love MI, Huber W, Anders S. Moderated estimation of fold change and dispersion for RNA-seq data  
808 with DESeq2. *Genome Biology*. BioMed Central Ltd; 2014;15: 31. doi:10.1186/s13059-014-0550-8
- 809 41. Wu H, Wang C, Wu Z. A new shrinkage estimator for dispersion improves differential expression  
810 detection in RNA-seq data. *Biostatistics*. Oxford University Press; 2013;14: 232–243.  
811 doi:10.1093/biostatistics/kxs033

- 812 42. Bustin SA, Benes V, Garson JA, Hellemans J, Huggett J, Kubista M, et al. The MIQE Guidelines:  
813 Minimum Information for Publication of Quantitative Real-Time PCR Experiments. *Clinical Chemistry.*  
814 *Clinical Chemistry*; 2009;55: 611–622. doi:10.1373/clinchem.2008.112797
- 815 43. Barber RD. GAPDH as a housekeeping gene: analysis of GAPDH mRNA expression in a panel of 72  
816 human tissues. *Physiological Genomics*. 2005;21: 389–395. doi:10.1152/physiolgenomics.00025.2005
- 817 44. Rubie C, Kempf K, Hans J, Su T, Tilton B, Georg T, et al. Housekeeping gene variability in normal and  
818 cancerous colorectal, pancreatic, esophageal, gastric and hepatic tissues. *MCP*. 2005;19: 101–109.  
819 doi:10.1016/j.mcp.2004.10.001
- 820 45. Bin Zhuo, Emerson S, Chang JH, Di Y. Identifying stably expressed genes from multiple RNA-Seq data  
821 sets. *PeerJ*. PeerJ Inc; 2016;4: e2791. doi:10.7717/peerj.2791
- 822 46. Van L T Hoang, Tom LN, Quek X-C, Tan J-M, Payne EJ, Lin LL, et al. RNA-seq reveals more  
823 consistent reference genes for gene expression studies in human non-melanoma skin cancers. *PeerJ*.  
824 PeerJ Inc; 2017;5: e3631. doi:10.7717/peerj.3631
- 825 47. Yim AK-Y, Wong JW-H, Ku Y-S, Qin H, Chan T-F, Lam H-M. Using RNA-Seq Data to Evaluate  
826 Reference Genes Suitable for Gene Expression Studies in Soybean. Amancio S, editor. *PLoS ONE*.  
827 *Public Library of Science*; 2015;10: e0136343. doi:10.1371/journal.pone.0136343
- 828 48. Subramanian A, Tamayo P, Mootha VK, Mukherjee S, Ebert BL, Gillette MA, et al. Gene set  
829 enrichment analysis: A knowledge-based approach for interpreting genome-wide expression profiles.  
830 *PNAS*. 2005;102: 15545–15550. doi:10.1073/pnas.0506580102
- 831 49. Maciejewski H. Gene set analysis methods: statistical models and methodological differences.  
832 *Briefings in Bioinformatics*. 2014;15: 504–518. doi:10.1093/bib/bbt002
- 833 50. Erb I, Quinn T, Lovell D, Notredame C. Differential Proportionality - A Normalization-Free Approach To  
834 Differential Gene Expression. *bioRxiv*. 2018. doi:10.1101/134536

## 835 **Supplemental Information Captions**

### 836 **Supplemental Notes**

837 **Supporting Information.** Contains Supplementary Notes 1-5. Note 1 argues that \*Seq datasets are  
838 compositional datasets. Note 2 discusses the three requirements of techniques for analyzing compositional  
839 data. Note 3 discusses RUVg and the Compositional Behavior of Spike-ins. Note 4 discusses extending the  
840 compositional approach to other high-throughput methods. Note 5 discusses how sleuth-ALR handles zeros.

### 841 **Supplemental Figure Legends**

842 **S1 Fig. The sleuth-ALR approach for compositional normalization.** Under the sleuth model, an  
843 observation is modeled as having some error associated with it that is due to the inferential procedure. The  
844 true value is modeled as a linear combination of covariates and biological noise. In the original sleuth model  
845 (shown in the bottom left), the estimate for the noisy observation was the estimated counts for feature  $i$  in  
846 sample  $j$ , normalized by the DESeq2 size factor. This and other current normalization methods attempt to  
847 translate purely relative information to inferences about absolute changes, but only by assuming no change to  
848 the total RNA content. The proposed sleuth-ALR estimate (shown on the bottom right) is an example of how to  
849 use compositional normalization. It first focuses on abundances (TPMs) rather than estimated counts, and  
850 second normalizes the abundances by a “reference feature”. This avoids having to assume only a few features  
851 change, but at the cost of not translating to inferences about absolute changes unless the chosen feature is a  
852 validated reference gene or spike-in.

853 **S2 Fig. A full-range view of the simulation results, accompanying Fig 2.** This shows the full range of FDR  
854 and sensitivity for the three simulation studies: **(A)** “small” (5% DE; roughly equal copy numbers in each group);  
855 **(B)** “down” (20% DE; ~33% decrease in copy numbers in the experimental group); and **(C)** “up” (20% DE; ~2.8-  
856 fold increase in copy numbers in the experimental group). This shows that (1) compositional normalization has  
857 similar or superior performance throughout the full range of sensitivities and FDR, and (2) RUVg has poor  
858 performance, especially when combined with edgeR.

859 **S3 Fig. ALDEx2 performs similarly in simulations regardless of which statistical method is used.** With  
860 the same simulation studies described in **Fig 2**, the performance of ALDEx2 was compared using the Welch t-  
861 test (the recommended statistic by the developers), the non-parametric Wilcoxon test, or the reported “overlap”  
862 statistic. The overlap statistic is the posterior probability of the effect size being 0 or the opposite direction as  
863 what is reported, given the Dirichlet bootstrap samples observed. These three statistics perform approximately  
864 similarly no matter which transformation is used: CLR, IQLR, or “denom” (aka ALR, the same as used in sleuth-  
865 ALR). This remains true across all three studies: **(A)** “small” (5% DE; roughly equal copy numbers in each group);  
866 **(B)** “down” (20% DE; 33% decrease in copy numbers in the experimental group); and **(C)** “up” (20% DE; 2.8-  
867 fold increase in copy numbers in the experimental group). This is important because the Welch and Wilcoxon  
868 statistics were the ones recommended by the developers but have poor performance when there are few  
869 samples.

870 **S4 Fig. sleuth and sleuth-ALR perform similarly regardless of which statistical method or data unit is**  
871 **used.** With the same simulation studies described in **Fig 2**, the performance of sleuth and sleuth-ALR was  
872 compared when using the Wald test or the likelihood ratio test (LRT), as well as when using TPMs or  
873 estimated counts for modeling. All combinations perform similarly within each tool across all three studies: **(A)**  
874 “small” (5% DE; roughly equal copy numbers in each group); **(B)** “down” (20% DE; 33% decrease in copy  
875 numbers in the experimental group); and **(C)** “up” (20% DE; 2.8-fold increase in copy numbers in the  
876 experimental group).

877 **S5 Fig. Spike-ins show a broad range of fold changes and systematic differences in studies with large**  
878 **shifts, accompanying Fig 3.** Using the “ground truth” counts from **polyester**, the log<sub>2</sub> fold change was  
879 calculated for all spike-ins, and then separated by their concentration in the ERCC Mixes, with “high”  
880 expression spike-ins having an average log<sub>2</sub> concentration of at least 3 attomoles between both mixes (N = 47  
881 out of 92). These were the spike-ins used for normalization in **Fig 2**. Shown are boxplots of the spike-in fold  
882 changes in each experiment across the three studies: **(A)** “small” (approximately constant total RNA); **(B)**  
883 “down” (~33 decrease in total RNA); and **(C)** “up” (~2.8-fold increase in total RNA). Low-expression spike-ins  
884 tend to have a broad range of fold changes, and the high-expression spike-ins tend to have a systematic bias

885 in fold changes in the “down” and “up” studies. For reference, the red dotted line in each run indicates the  
886 “ideal” fold change for a spike-in, if it precisely matches the reciprocal of the change in copy numbers between  
887 the control and experimental conditions; the blue and gold dotted lines indicate the fold change between  
888 conditions of the DESeq2 median-of-ratios and the sleuth-ALR geometric mean of high-expression spike-ins,  
889 respectively, suggesting that both are generally good approximations of the “ideal” fold change, and thus are  
890 good denominators for normalization.

891 **S6 Fig. The False Discovery Rate and Relative sensitivity for the Bottomly self-consistency test at**  
892 **additional FDR levels.** This accompanies Fig 4 in the main text. Shown here are the (A) False Discovery  
893 Rate, and (B) relative sensitivity (% change) at the FDR levels of 0.01 and 0.05.

894 **S7 Fig. Effect of imputation value on bootstrap variation.** This depicts the summary of bootstraps variation  
895 for AAGAB-207 (ENST00000561452.5) within each sample of run #6. The true fold change for AAGAB-207 copy  
896 numbers is an 82% decrease. The recommended strategy in Compositional Data Analysis for imputing zero  
897 values is to choose a value smaller than the smallest observed value; however, because of the extremely small  
898 estimated abundances, this results in a very large variation in the bootstraps within each sample (A). This occurs  
899 when at least one bootstrap reports an estimated abundance of zero. Our recommendation is to follow the  
900 strategy of previous tools, and choose a larger value to impute. Panel (B) shows the reduction in bootstrap  
901 variation after choosing 0.01 for the imputation. The wide variation observed in (A) resulted in a non-significant  
902 q-value (0.450), whereas the stabilized variation observed in (B) resulted in a significant q-value (0.047).

903 **S8 Fig. Effect of imputation on overall simulation performance.** This depicts the full sensitivity versus false  
904 discovery rate curve for different choices of imputation value, as compared to standard sleuth as well as the  
905 recommended strategy of choosing a value smaller than the smallest observed value (here depicted as “sleuth-  
906 ALR counts” for A-C and “sleuth-ALR TPM” for D-F). (A) and (D) show the results for the “small” simulation  
907 group (5% DE; <2% change in copy numbers per cell); (B) and (E) show the results for the “down” simulation  
908 group (20% DE; 33% decrease in overall copy numbers per cell); (C) and (F) show the results for the “up”  
909 simulation group (20% DE; 2.8-fold increase in overall copy numbers per cell). There is improved performance

910 of using imputation versus no imputation, and there are only minor differences in performance in all three studies  
911 among any of the choices for imputation values except 0.1 TPM impute value, which is very high (roughly  
912 equivalent to a count imputation of 3), in the “up” study.

913

#### 914 **Supplemental Tables Legends**

915 **S1 Table. Summary of Parameters for Simulation Studies.** For each of the fifteen simulation runs, shown are  
916 the parameters to establish the number of differentially expressed (DE) transcripts, as well as the number that  
917 are up-regulated versus down-regulated. Only transcripts with a TPM of at least 1 were used to simulated  
918 differential expression, but the probability of differential expression was determined by the total number of  
919 transcripts (~200K). The proportion of up-regulated transcripts for the “small” study was tuned to result in similar  
920 total RNA content in both conditions. The random number generator seed was chosen solely on the basis of  
921 yielding consistency in total RNA content across each run within a study. Also shown are the actual number of  
922 DE transcripts present in the set of filtered transcripts used by all tools for each run.

923

924 **S2 Table. Total RNA Content Per Cell Per Condition for all Simulation Runs.** For each of the fifteen  
925 simulation runs, shown are the total RNA copy numbers per cell for each condition. Also reported are the average  
926 change in copy numbers between the two conditions for each study.

927

928 **S3 Table. Doubling the copy numbers per cell results in the same composition.** Depicted is a toy example  
929 of a simple cell with five genes of varying abundances. After an experimental manipulation, each gene has  
930 exactly double the copy numbers per cell compared to the control condition. This results in the same relative  
931 abundances, and therefore the same composition.

932

933 **S4 Table. Spike-in abundances change with large compositional shifts but still accurately capture fold**  
934 **changes.** Depicted is another toy example using the same cell with five genes. In this case, there are large  
935 changes in the mRNA genes, but no change in the rRNA gene. Spike-ins added in equal amounts both before



936 and after RNA isolation, show changes in their abundances, and therefore would have changes in the  
937 percentage of reads mapping to them. Despite this change in their abundance, spike-ins accurately capture  
938 the true fold changes.

939

940 **S5 Table. Spike-in abundances change discordantly when non-poly-adenylated RNA changes.** Depicted

941 is another toy example using the same cell with five genes. In this experiment, there is a small change in the  
942 rRNA, but no changes to the mRNA genes. Spike-ins were added in equal amounts after RNA isolation, to  
943 simulate the protocol used in the zebrafish dataset. Because of the unobserved rRNA change, the spike-ins  
944 are affected by the compositional change and show discordant fold changes when compared to the mRNA  
945 genes. Normalizing the mRNA genes to the spike-ins results in artefactually elevated fold changes. Thus, the  
946 discrepancy observed in the zebrafish dataset can be explained by unobserved changes in the rRNA.

947

948 **S6 Table. Spike-ins must be added before RNA isolation to accurately capture true fold changes.**

949 Depicted is a final toy example using the same cell with five genes. In this experiment, there are large and  
950 varying changes to both the rRNA and mRNA genes. Spike-ins were added in equal amounts both before and  
951 after RNA isolation. Only the spike-in added before RNA isolation can accurately capture the fold changes of  
952 the mRNA genes; the spike-in added after is itself affected by the compositional shift of the simultaneous  
953 changes in both the rRNA and mRNA genes.

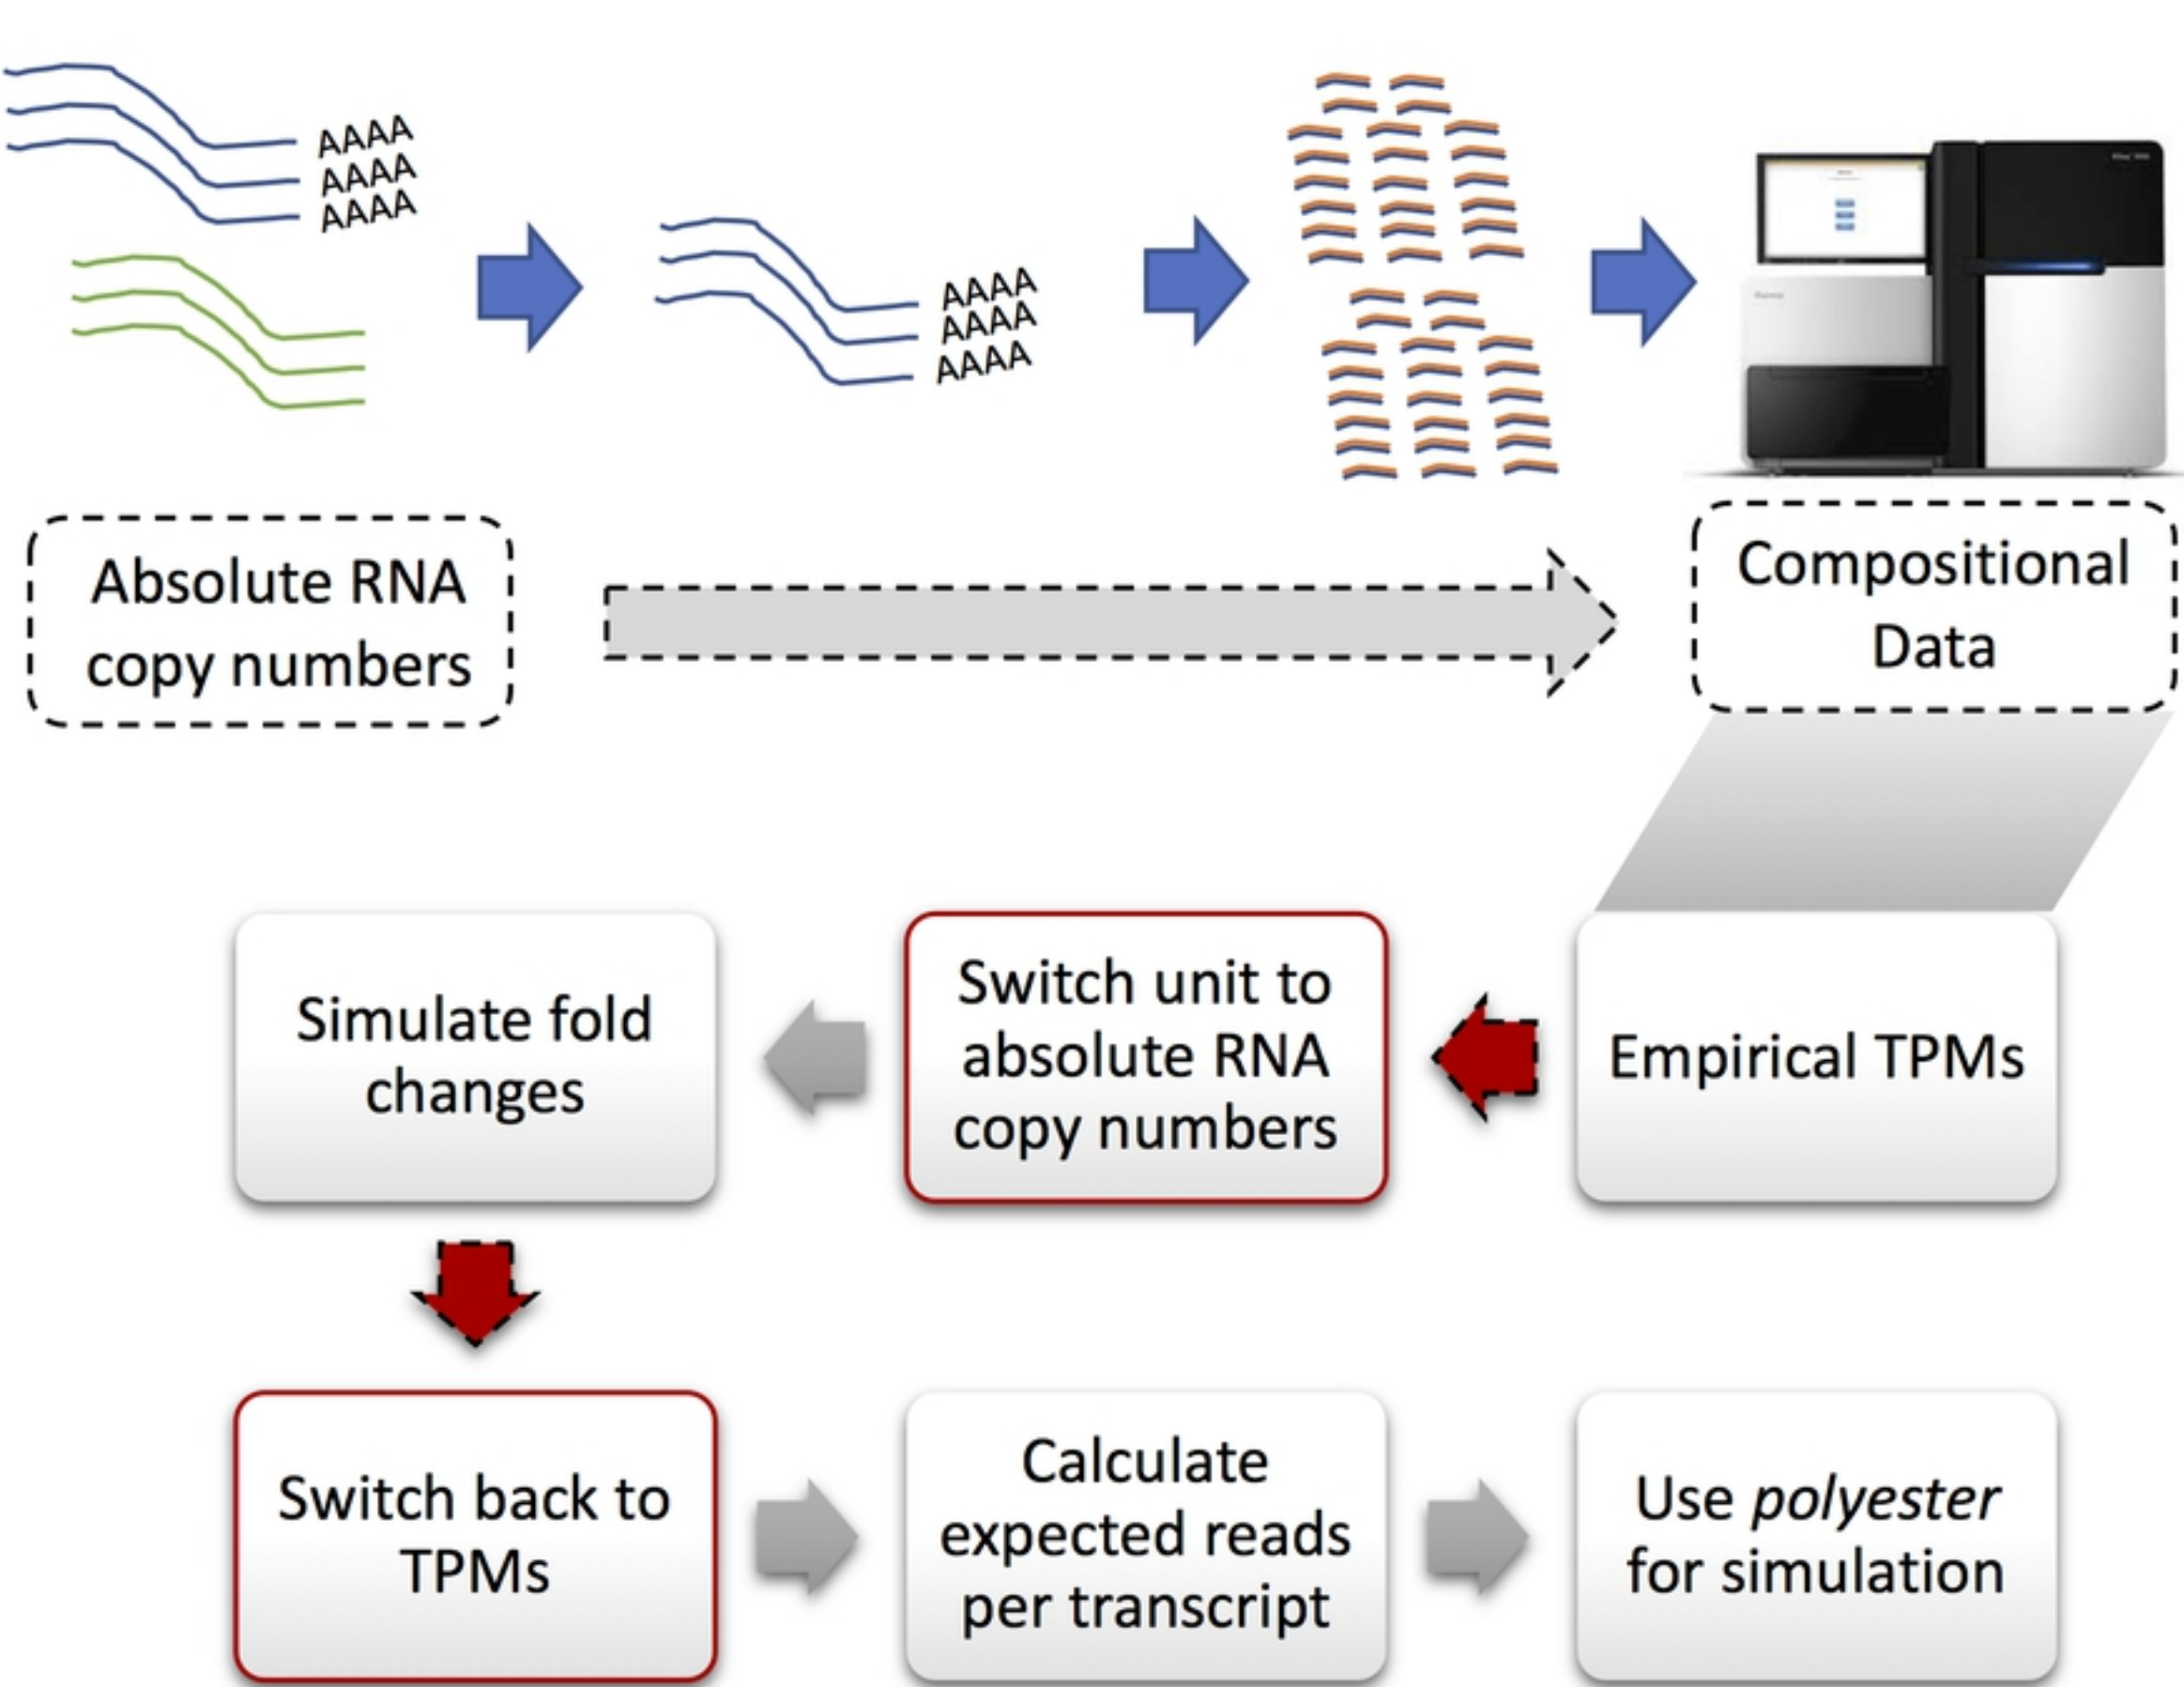

Fig 1

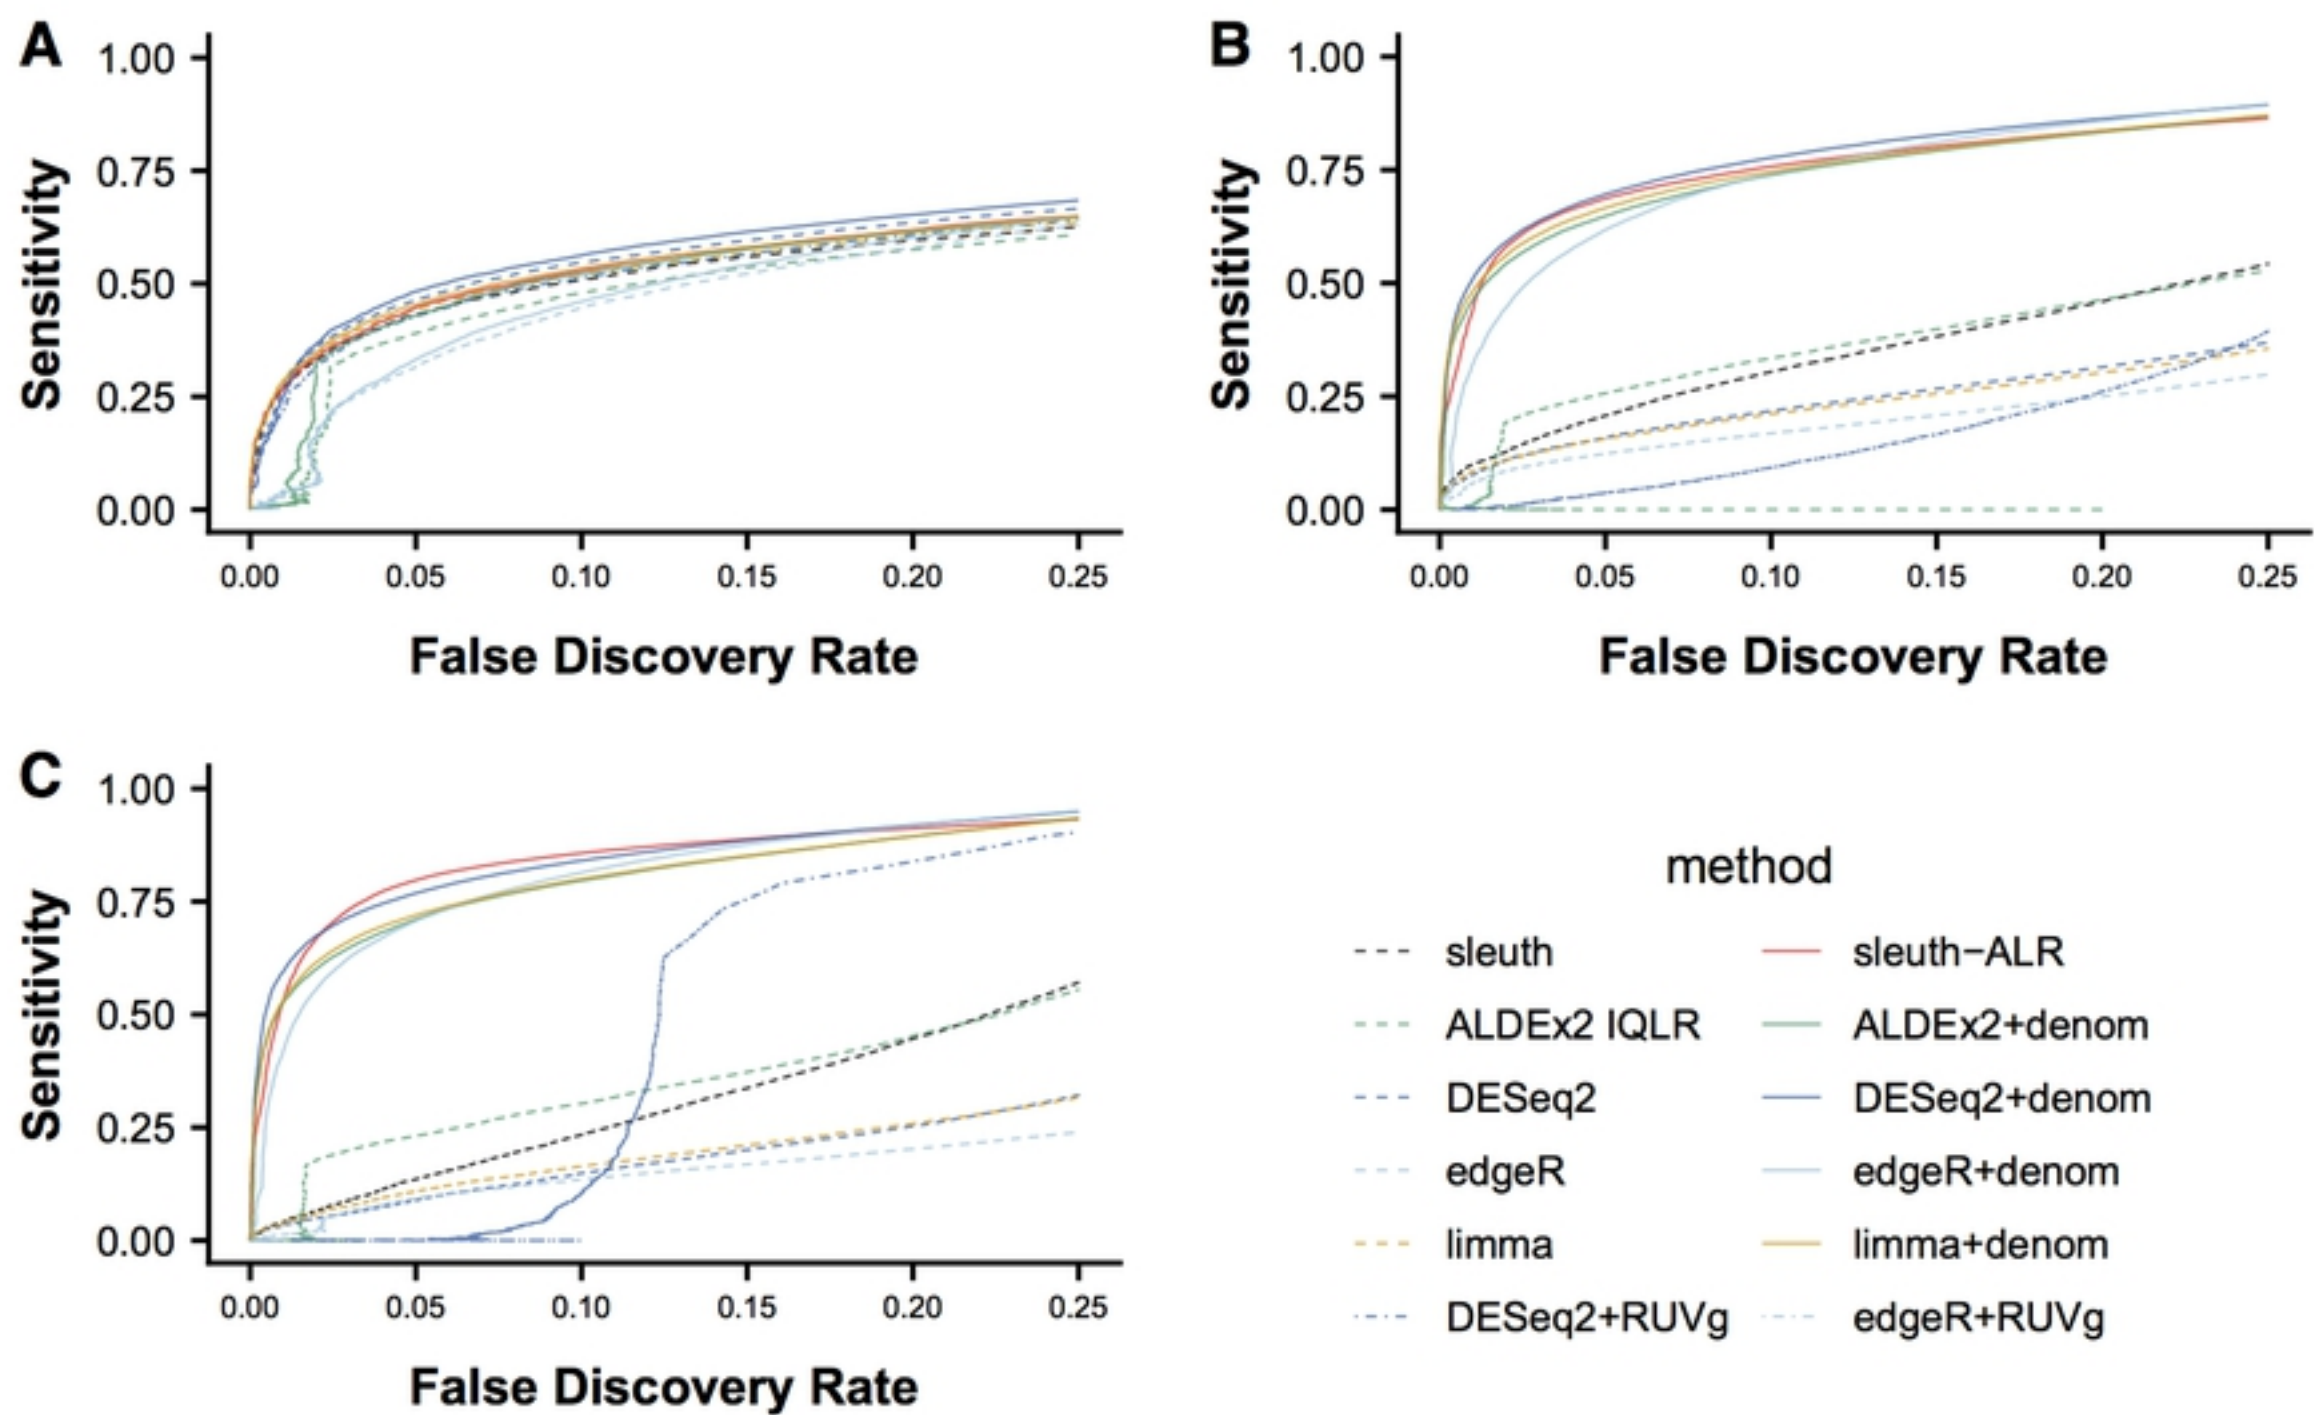

Fig 2

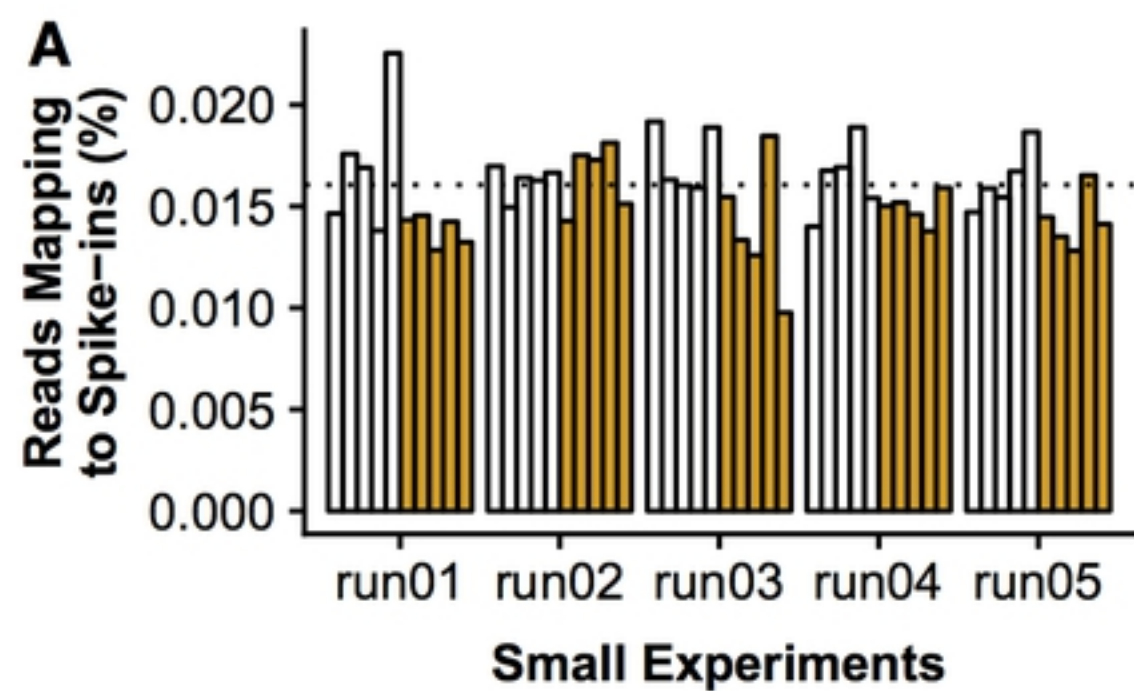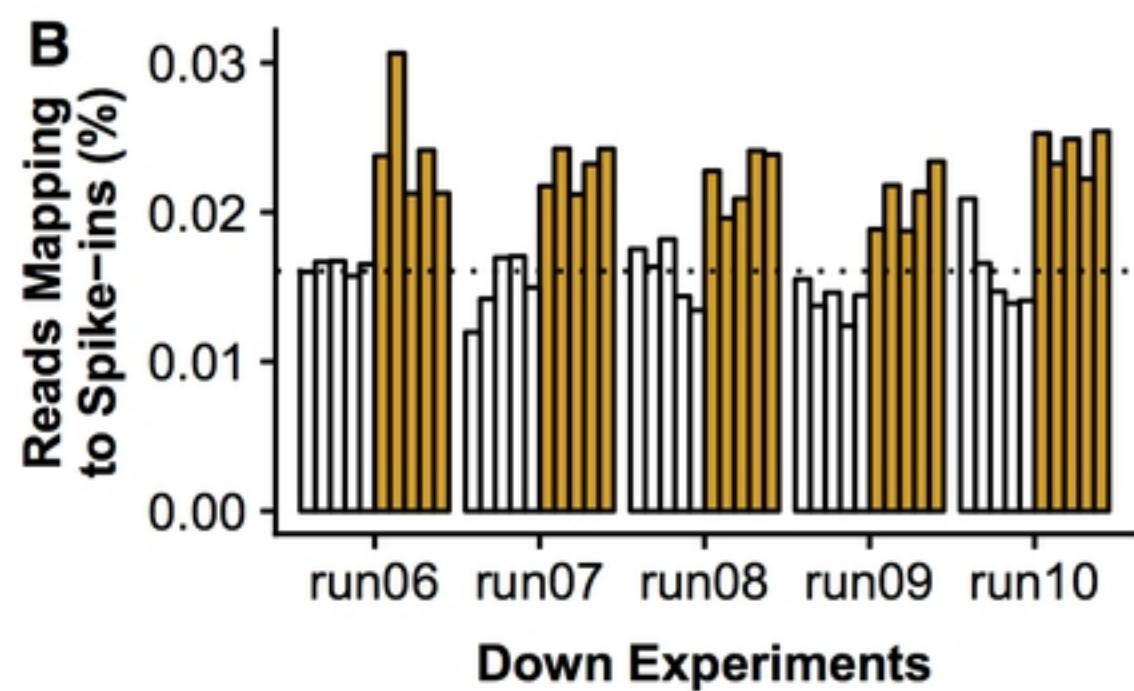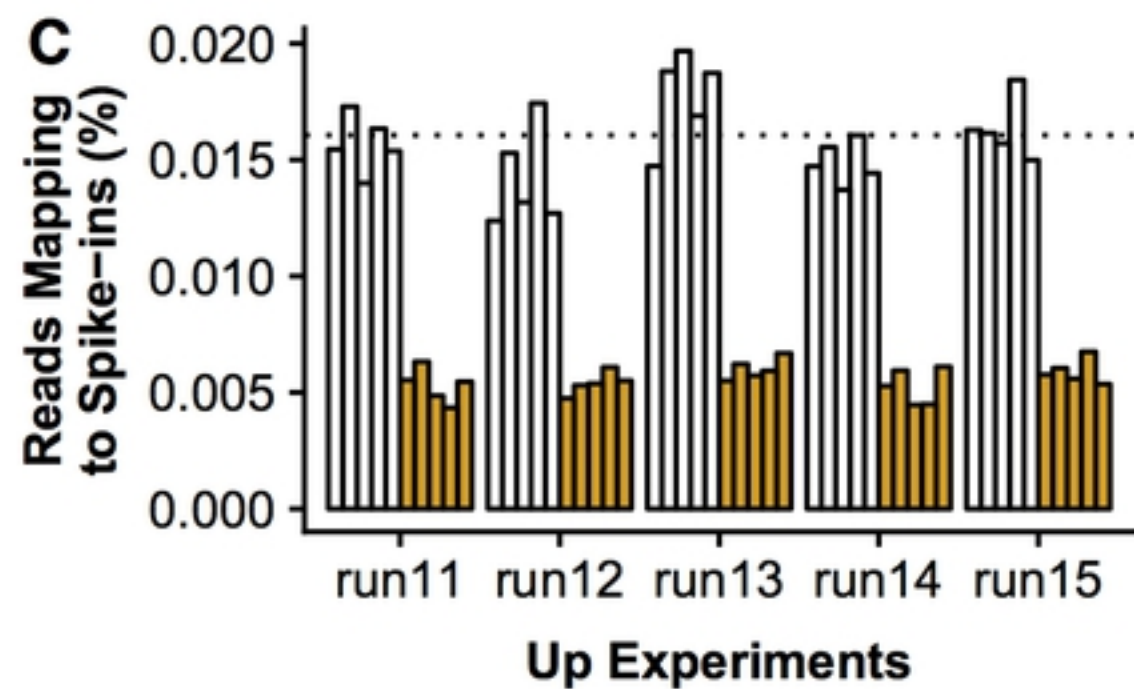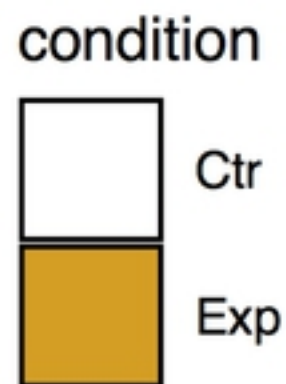

Fig 3

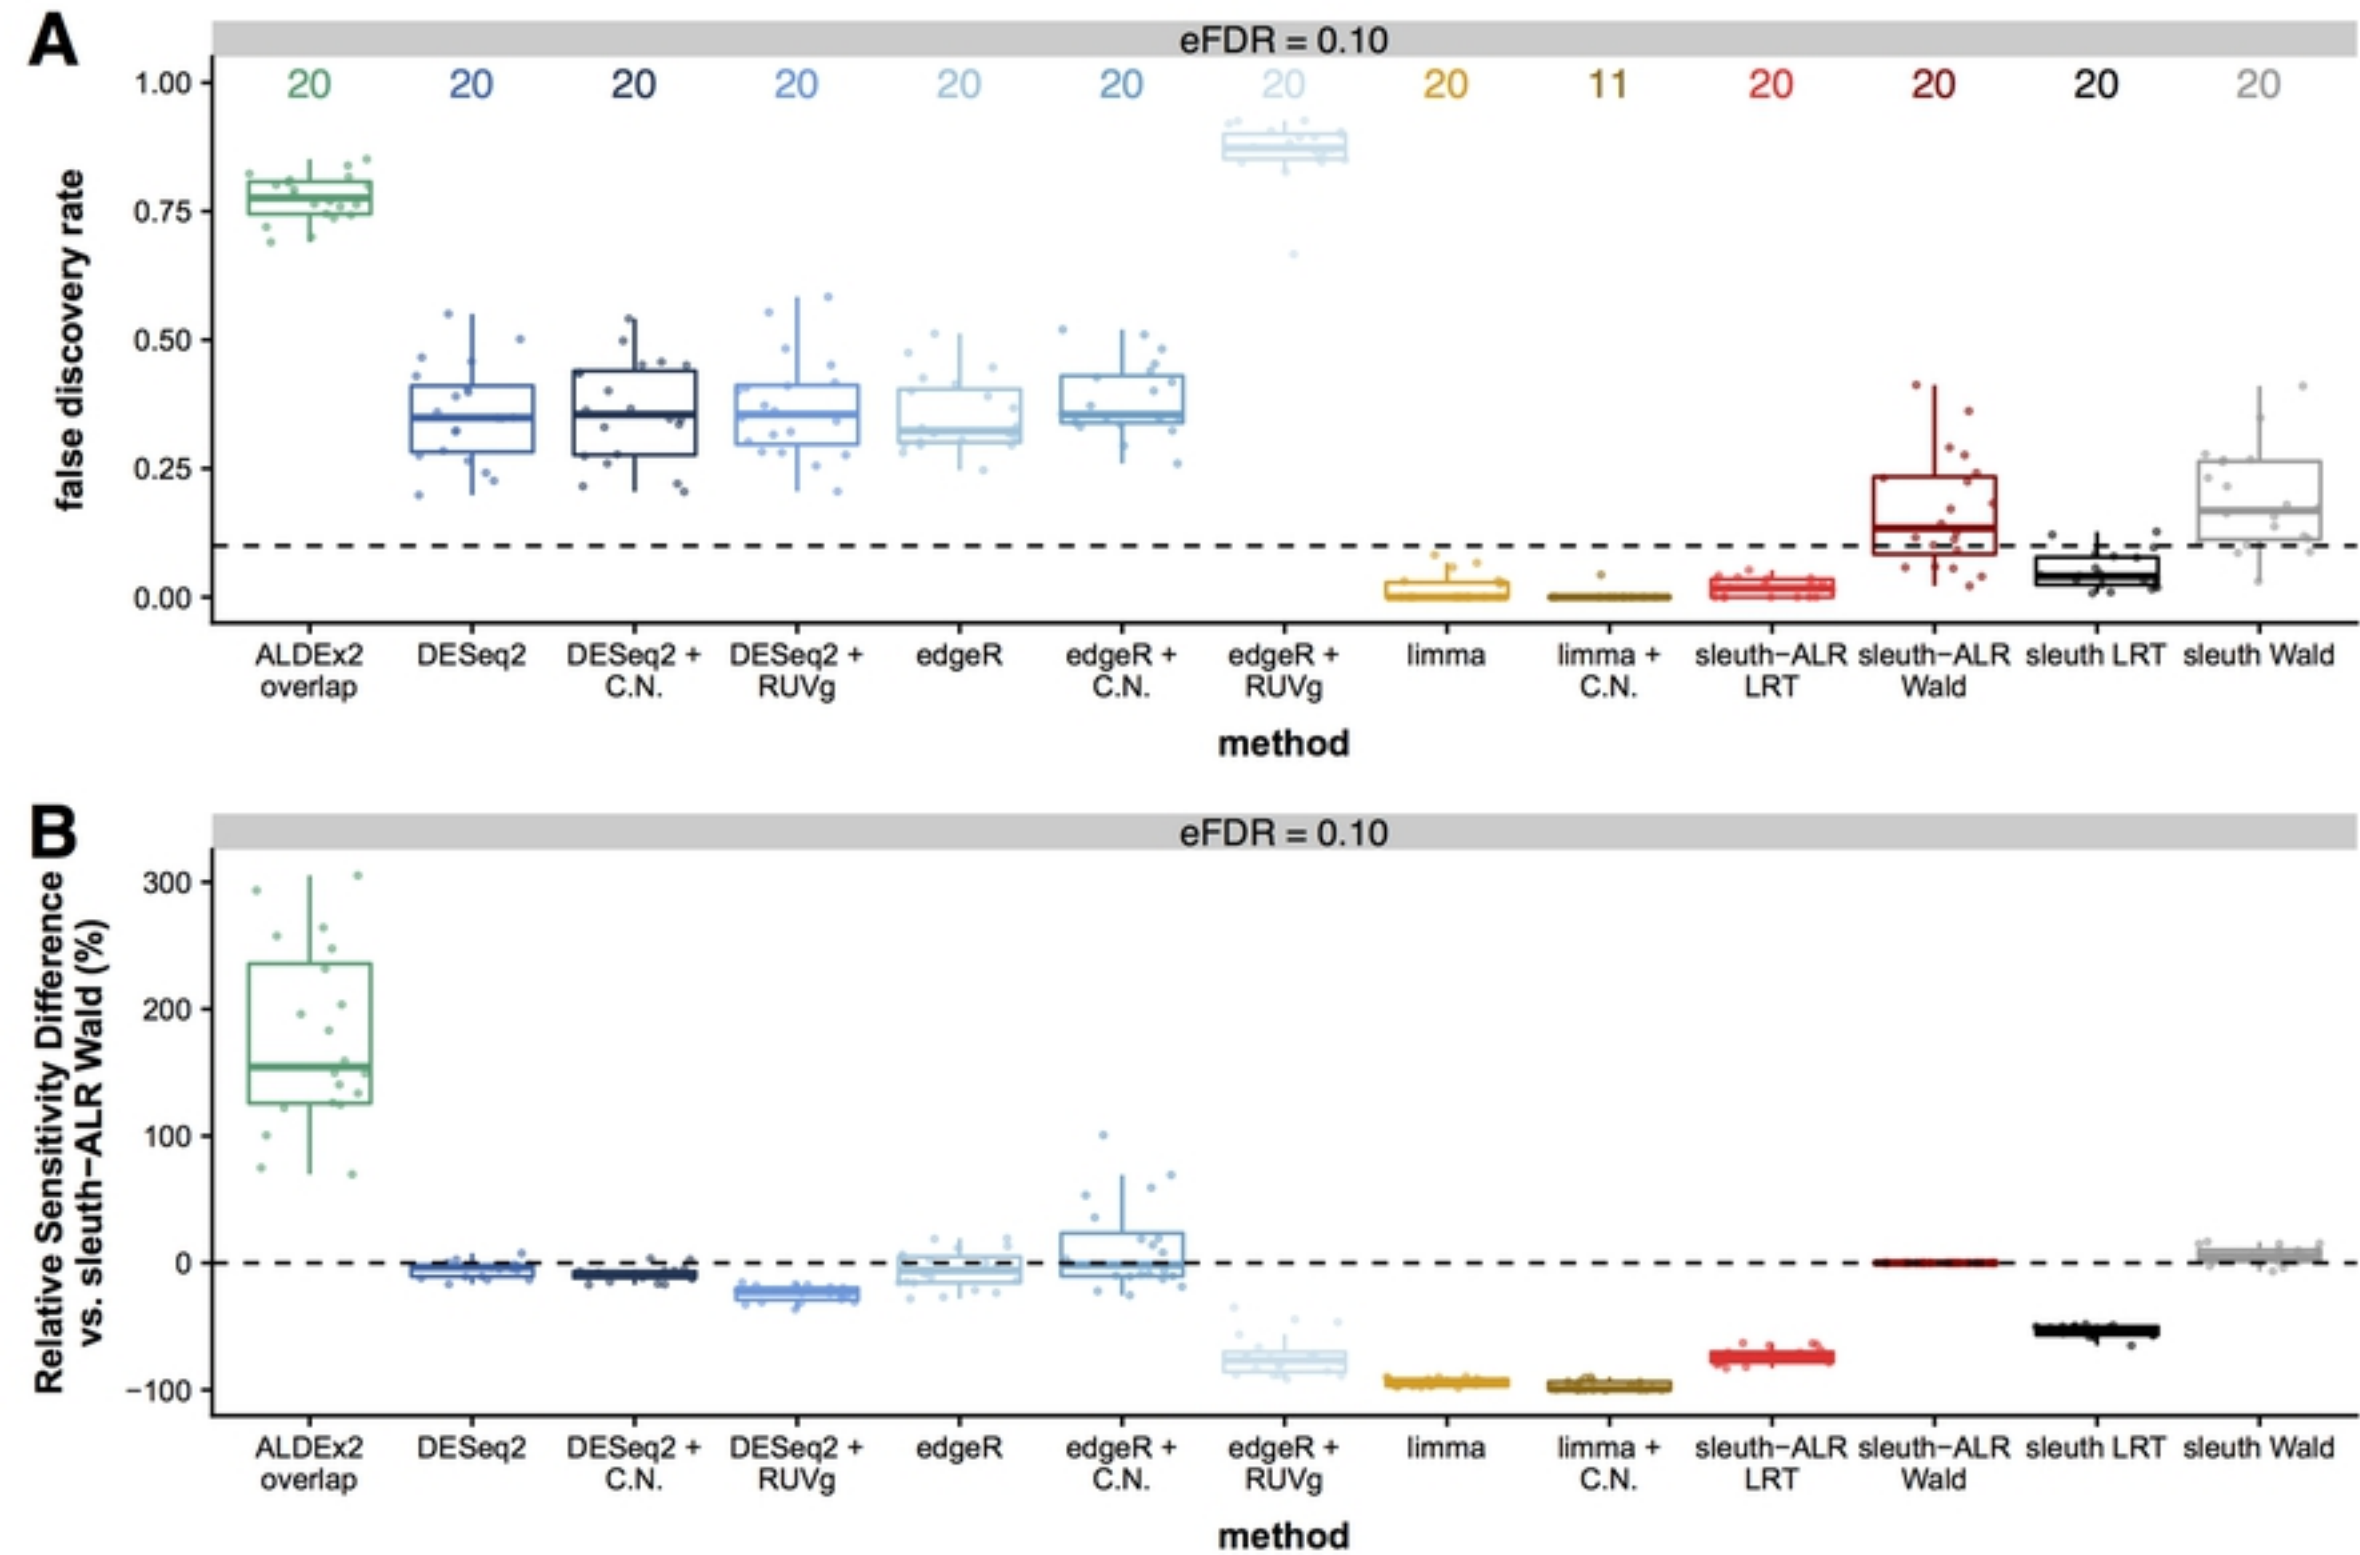

Fig 4

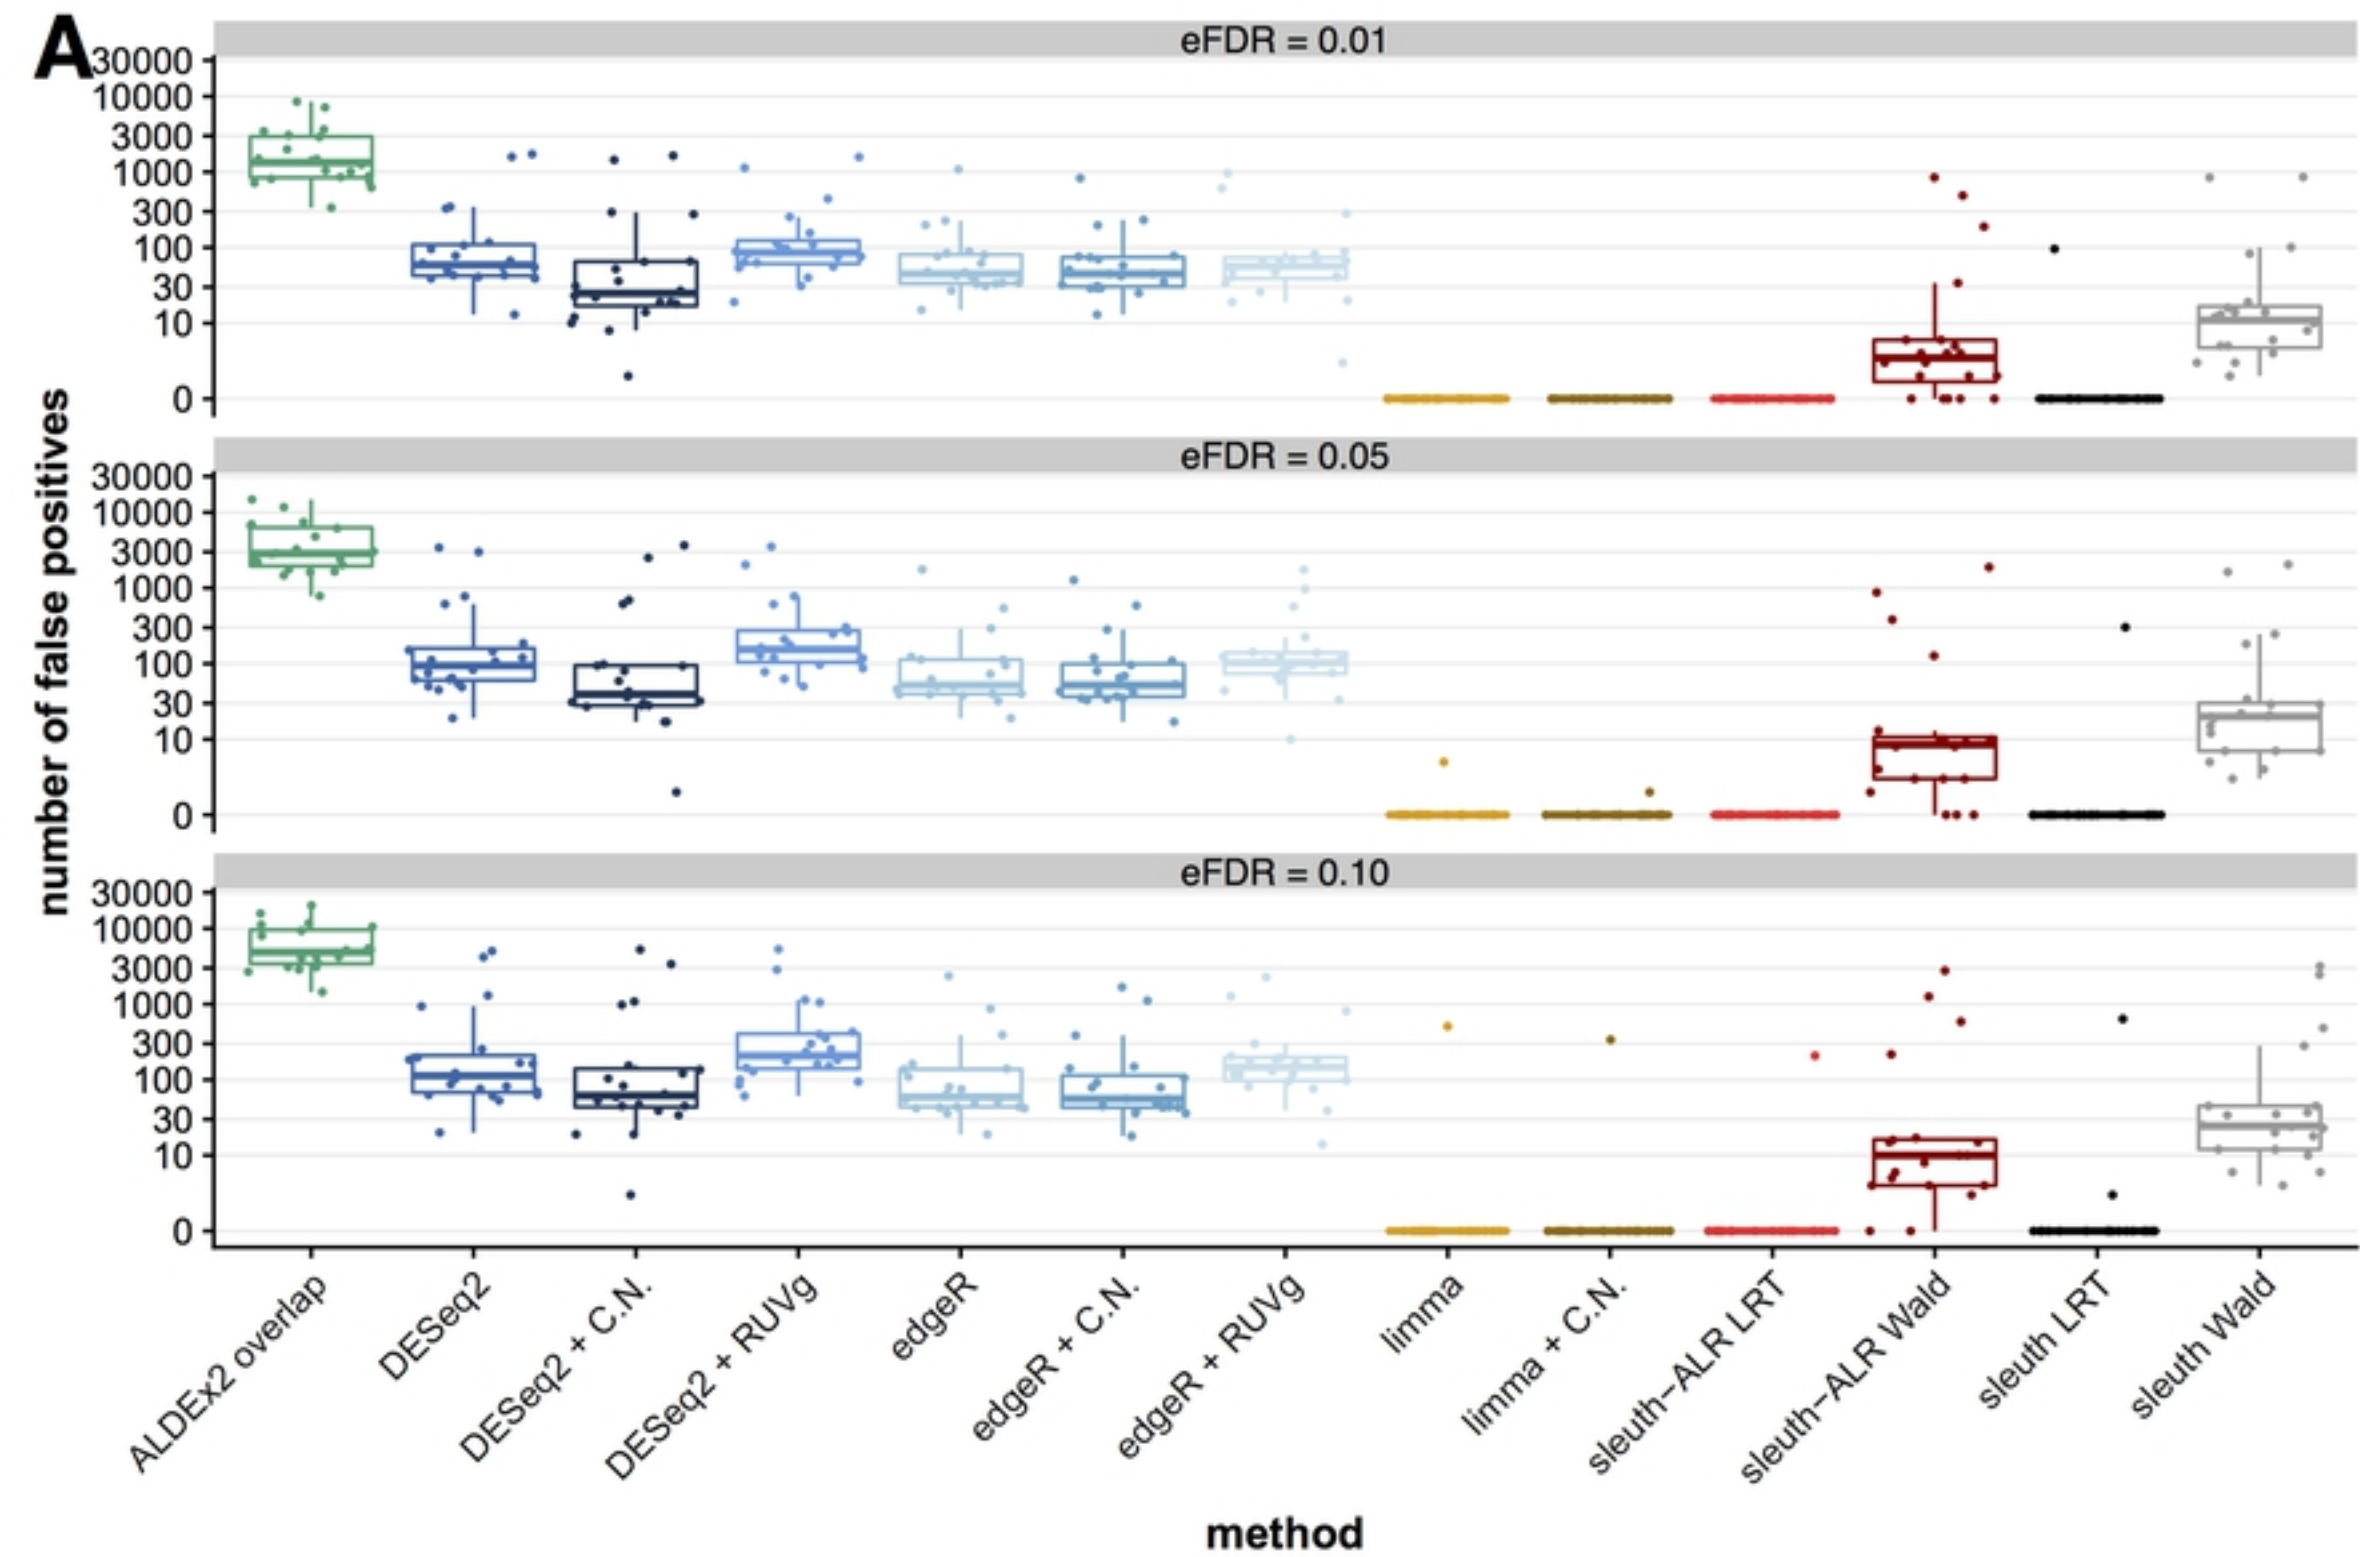

Fig 5

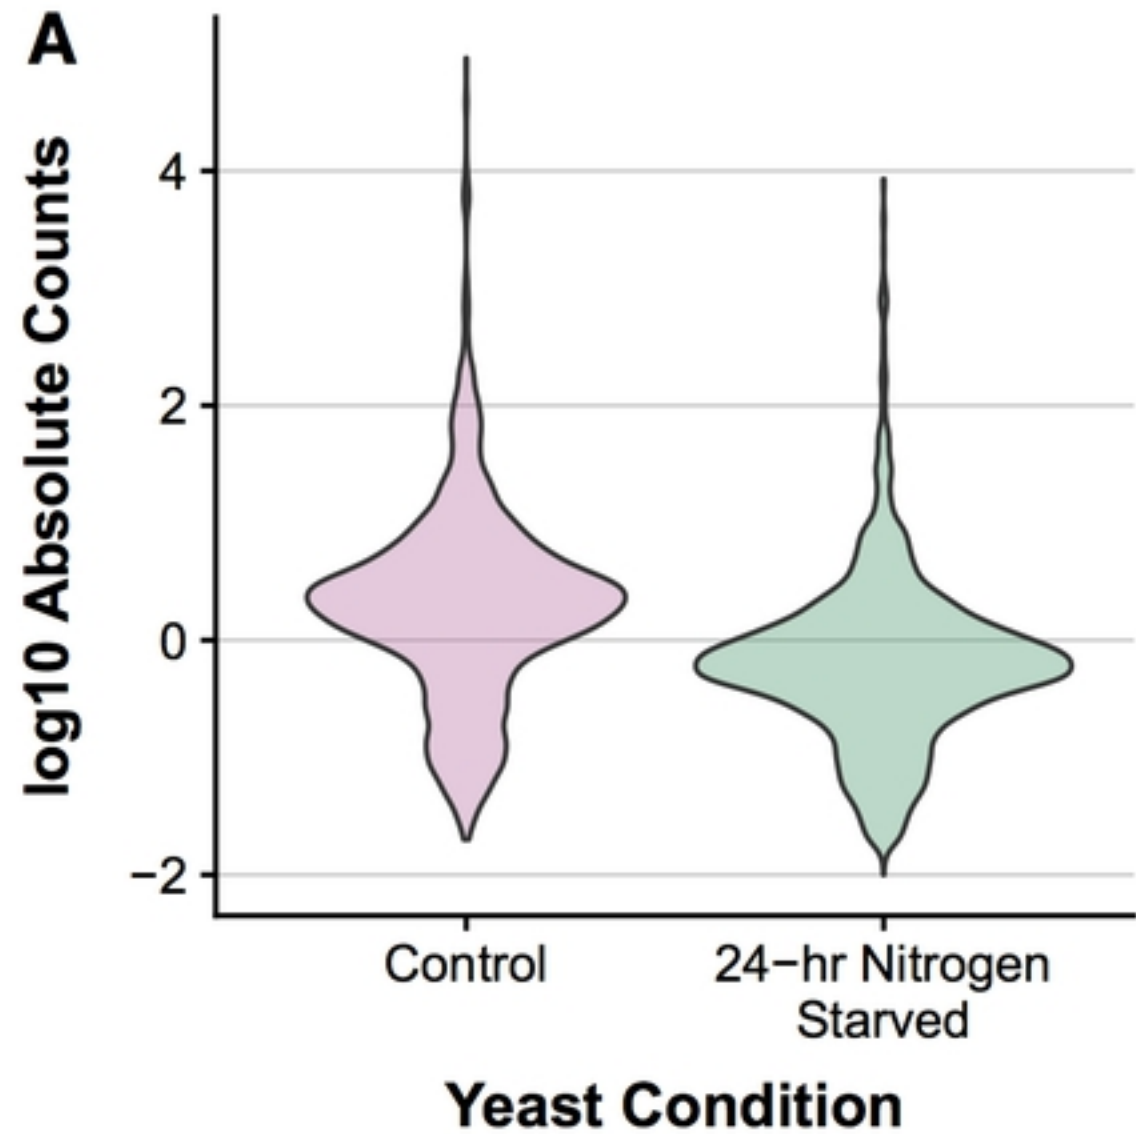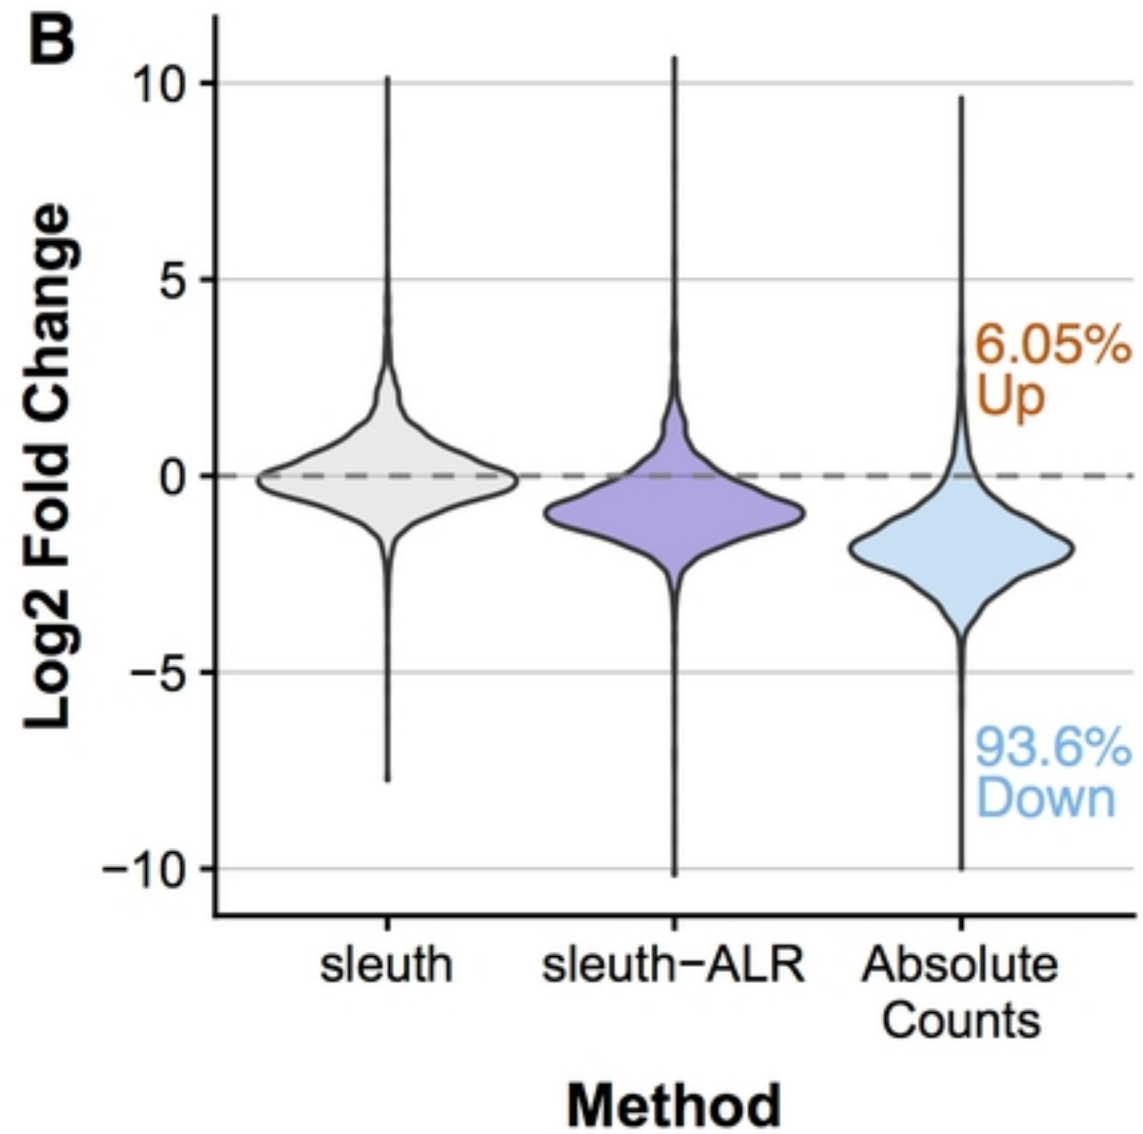

Fig 6
